# Supplementary material
Source: ML conference proceedings conference paper supplement (https://proceedings.mlr.press/v139/killamsetty21a.html)
Supplement: Supplementary file 1 [file killamsetty21a-supp.pdf]

# Appendix

## A. Summary of Notation

| Topic                      | Notation                                                                                                                                                   | Explanation                                                                                                                                                                                       |
|----------------------------|------------------------------------------------------------------------------------------------------------------------------------------------------------|---------------------------------------------------------------------------------------------------------------------------------------------------------------------------------------------------|
| Data (sub)Sets and indices | $U$                                                                                                                                                        | Set of $N$ instances in training set                                                                                                                                                              |
|                            | $V$                                                                                                                                                        | Set of $M$ instances in validation set                                                                                                                                                            |
|                            | $\mathcal{X}^t$                                                                                                                                            | Subset of instances from $U$ at the $t^{\text{th}}$ epoch                                                                                                                                         |
|                            | $W$                                                                                                                                                        | A generic reference to both $U$ and $V$                                                                                                                                                           |
|                            | $\pi_t^i \in \mathcal{X}$                                                                                                                                  | Assignment of element $i \in W$ to an element of $\mathcal{X}$                                                                                                                                    |
| Parameters                 | $\theta^*$                                                                                                                                                 | Optimal model parameter (vector)                                                                                                                                                                  |
|                            | $\theta_t$                                                                                                                                                 | Updated parameter (vector) at the $t^{\text{th}}$ epoch                                                                                                                                           |
|                            | $\mathbf{w}^t$                                                                                                                                             | Vector weights associated with each data point in $\mathcal{X}^t$ (at the $t^{\text{th}}$ epoch)                                                                                                  |
| Loss Functions             | $L_T$                                                                                                                                                      | Training loss which when evaluated on $x_i \in U$ is referred to as $L_T^i$                                                                                                                       |
|                            | $L_V$                                                                                                                                                      | Validation loss which when evaluated on $x_j \in V$ is referred to as $L_V^j$                                                                                                                     |
|                            | $L$                                                                                                                                                        | Generic reference to the loss function which when evaluated on $x_i$ is referred to as $L^i$ .                                                                                                    |
|                            | $\text{Err}(\mathbf{w}^t, \mathcal{X}^t, L, L_T, \theta_t)$                                                                                                | $\ \sum_{i \in \mathcal{X}^t} w_i^t \nabla_{\theta} L_T^i(\theta_t) - \nabla_{\theta} L(\theta_t)\ $                                                                                              |
|                            | $E(\mathcal{X})$                                                                                                                                           | $\min_{\mathbf{w}} \text{Err}(\mathbf{w}, \mathcal{X}, L, L_T, \theta_t)$                                                                                                                         |
|                            | $F(\mathcal{X})$                                                                                                                                           | $L_{\max} - E(\mathcal{X})$ where $L_{\max}$ is an upperbound on $E(\mathcal{X})$                                                                                                                 |
|                            | $\hat{E}(\mathcal{X})$                                                                                                                                     | The upper bound $\min_{\mathbf{w}} \text{Err}(\mathbf{w}, \mathcal{X}, L, L_T, \theta_t) \leq \hat{E}(\mathcal{X})$ minimized in Section                                                          |
|                            | $\hat{F}(\mathcal{X})$                                                                                                                                     | The facility location lower bound function $\sum_{i \in W} \max_{j \in \mathcal{X}} (L_{\max} - \ \nabla_{\theta} L^i(\theta_t) - \nabla_{\theta} L_T^j(\theta_t)\ )$ to be maximized             |
|                            | $E_{\lambda}(\mathcal{X}, \mathbf{w})$                                                                                                                     | Regularized version of $E(\mathcal{X})$ defined as $\ \sum_{i \in \mathcal{X}} \mathbf{w} \nabla_{\theta} L_T^i(\theta) - \nabla_{\theta} L(\theta)\ ^2 + \lambda \ \mathbf{w}\ ^2$ . See Section |
|                            | $E_{\lambda}(\mathcal{X})$                                                                                                                                 | $\min_{\mathbf{w}} E_{\lambda}(\mathcal{X}, \mathbf{w})$                                                                                                                                          |
| $F_{\lambda}(\mathcal{X})$ | $L_{\max} - \min_{\mathbf{w}} E_{\lambda}(\mathcal{X}, \mathbf{w})$ which we prove to be $\gamma$ -weakly sub-modular in Section and subsequently maximize |                                                                                                                                                                                                   |
| Hyperparameters            | $\sigma_T$                                                                                                                                                 | Upperbound on the gradient of $L_T^i$                                                                                                                                                             |
|                            | $\sigma_V$                                                                                                                                                 | Upperbound on the gradient of $L_V^j$                                                                                                                                                             |
|                            | $k$                                                                                                                                                        | Size of selected subset of points                                                                                                                                                                 |
|                            | $R$                                                                                                                                                        | The number of training epochs after which data selection is periodically performed                                                                                                                |
|                            | $\alpha_t$                                                                                                                                                 | The learning rate schedule at the $t^{\text{th}}$ epoch                                                                                                                                           |

Table 1. Organization of the notations used throughout this paper

## B. Proofs of the Technical Results

### B.1. Proof of Theorem 1

We begin by first stating and then proving Theorem 1.

**Theorem** Any adaptive data selection algorithm (run with full gradient descent), defined via weights  $\mathbf{w}^t$  and subsets  $\mathcal{X}^t$  for  $t = 1, \dots, T$ , enjoys the following guarantees:

- (1). If  $L_T$  is Lipschitz continuous with parameter  $\sigma_T$ , optimal model parameters  $\theta^*$ , and  $\alpha = \frac{D}{\sigma_T \sqrt{T}}$ , then

$$\min_{t=1:T} L(\theta_t) - L(\theta^*) \leq \frac{D\sigma_T}{\sqrt{T}} + \frac{D}{T} \sum_{t=1}^{T-1} \text{Err}(\mathbf{w}^t, \mathcal{X}^t, L, L_T, \theta_t).$$

(2) If  $L_T$  is Lipschitz smooth with parameter  $\mathcal{L}_T$ , optimal model parameters  $\theta^*$ , and  $L_T^i$  satisfies  $0 \leq L_T^i(\theta) \leq \beta_T, \forall i$ , then setting  $\alpha = \frac{1}{\mathcal{L}_T}$ , we have  $\min_{t=1:T} L(\theta_t) - L(\theta^*) \leq \frac{D^2\mathcal{L}_T+2\beta_T}{2T} + \frac{D}{T} \sum_{t=1}^{T-1} \text{Err}(\mathbf{w}^t, \mathcal{X}^t, L, L_T, \theta_t)$ .

(3) If  $L_T$  is Lipschitz continuous with parameter  $\sigma_T$ , optimal model parameters  $\theta^*$ , and  $L$  is strongly convex with parameter  $\mu$ , then setting a learning rate  $\alpha_t = \frac{2}{\mu(1+t)}$ , we have  $\min_{t=1:T} L(\theta_t) - L(\theta^*) \leq \frac{2\sigma_T^2}{\mu(T+1)} + \sum_{t=1}^{T-1} \frac{2Dt}{T(T+1)} \text{Err}(\mathbf{w}^t, \mathcal{X}^t, L, L_T, \theta_t)$ .

PROOF Suppose the gradients of validation loss and training loss are sigma bounded by  $\sigma_V$  and  $\sigma_T$  respectively. Let  $\theta_t$  be the model parameters at epoch  $t$  and  $\theta^*$  be the optimal model parameters.

Let,  $L_w(\theta_t) = \sum_{i \in \mathcal{X}^t} w_i^t L_T^i(\theta_t)$  be the weighted subset training loss parameterized by model parameters  $\theta_t$  at time step  $t$ . Let  $\alpha_t$  be the learning rate used at epoch  $t$ .

From the definition of Gradient Descent, we have:

$$\nabla_{\theta} L_w(\theta_t)^T (\theta_t - \theta^*) = \frac{1}{\alpha_t} (\theta_t - \theta_{t+1})^T (\theta_t - \theta^*) \quad (6)$$

$$\nabla_{\theta} L_w(\theta_t)^T (\theta_t - \theta^*) = \frac{1}{2\alpha_t} \left( \|\theta_t - \theta_{t+1}\|^2 + \|\theta_t - \theta^*\|^2 - \|\theta_{t+1} - \theta^*\|^2 \right) \quad (7)$$

$$\nabla_{\theta} L_w(\theta_t)^T (\theta_t - \theta^*) = \frac{1}{2\alpha_t} \left( \left\| \alpha_t \sum_{i \in \mathcal{X}^t} w_i^t \nabla_{\theta} L_T^i(\theta_t) \right\|^2 + \|\theta_t - \theta^*\|^2 - \|\theta_{t+1} - \theta^*\|^2 \right) \quad (8)$$

We can rewrite the function  $\nabla_{\theta} L_w(\theta_t)^T (\theta_t - \theta^*)$  as follows:

$$\nabla_{\theta} L_w(\theta_t)^T (\theta_t - \theta^*) = \nabla_{\theta} L_w(\theta_t)^T (\theta_t - \theta^*) - \nabla_{\theta} L(\theta_t)^T (\theta_t - \theta^*) + \nabla_{\theta} L(\theta_t)^T (\theta_t - \theta^*) \quad (9)$$

Combining the equations (8) and (9) we have,

$$\nabla_{\theta} L_w(\theta_t)^T (\theta_t - \theta^*) - \nabla_{\theta} L(\theta_t)^T (\theta_t - \theta^*) + \nabla_{\theta} L(\theta_t)^T (\theta_t - \theta^*) = \frac{1}{2\alpha_t} \left( \left\| \alpha_t \sum_{i \in \mathcal{X}^t} w_i^t \nabla_{\theta} L_T^i(\theta_t) \right\|^2 + \|\theta_t - \theta^*\|^2 - \|\theta_{t+1} - \theta^*\|^2 \right) \quad (10)$$

$$\nabla_{\theta} L(\theta_t)^T (\theta_t - \theta^*) = \frac{1}{2\alpha_t} \left( \left\| \alpha_t \sum_{i \in \mathcal{X}^t} w_i^t \nabla_{\theta} L_T^i(\theta_t) \right\|^2 + \|\theta_t - \theta^*\|^2 - \|\theta_{t+1} - \theta^*\|^2 \right) - (\nabla_{\theta} L_w(\theta_t) - \nabla_{\theta} L(\theta_t))^T (\theta_t - \theta^*) \quad (11)$$

Summing up equation (11) for different values of  $t \in [0, T-1]$  and assuming a constant learning rate of  $\alpha_t = \alpha$ , we have:

$$\begin{aligned} \sum_{t=0}^{T-1} \nabla_{\theta} L(\theta_t)^T (\theta_t - \theta^*) &= \frac{1}{2\alpha} \|\theta_0 - \theta^*\|^2 - \|\theta_T - \theta^*\|^2 + \sum_{t=0}^{T-1} \left( \frac{1}{2\alpha} \left\| \alpha \sum_{i \in \mathcal{X}^t} w_i^t \nabla_{\theta} L_T^i(\theta_t) \right\|^2 \right) \\ &\quad + \sum_{t=0}^{T-1} \left( (\nabla_{\theta} L_w(\theta_t) - \nabla_{\theta} L(\theta_t))^T (\theta_t - \theta^*) \right) \end{aligned}$$

Since  $\|\theta_T - \theta^*\|^2 \geq 0$ , we have:

$$\sum_{t=0}^{T-1} \nabla_{\theta} L(\theta_t)^T (\theta_t - \theta^*) \leq \frac{1}{2\alpha} \|\theta_0 - \theta^*\|^2 + \sum_{t=0}^{T-1} \left( \frac{1}{2\alpha} \left\| \alpha \sum_{i \in \mathcal{X}^t} w_i^t \nabla_{\theta} L_T^i(\theta_t) \right\|^2 \right) + \sum_{t=0}^{T-1} \left( (\nabla_{\theta} L_w(\theta_t) - \nabla_{\theta} L(\theta_t))^T (\theta_t - \theta^*) \right) \quad (12)$$

**Case 1  $L_T$  is lipschitz continuous with parameter  $\sigma_T$  and  $L$  is a convex function**

From convexity of function  $L(\theta)$ , we know  $L(\theta_t) - L(\theta^*) \leq \nabla_{\theta} L(\theta_t)^T (\theta_t - \theta^*)$ . Combining this with Equation 12 we have,

$$\sum_{t=0}^{T-1} L(\theta_t) - L(\theta^*) \leq \frac{1}{2\alpha} \|\theta_0 - \theta^*\|^2 + \sum_{t=0}^{T-1} \left( \frac{1}{2\alpha} \left\| \alpha \sum_{i \in \mathcal{X}^t} w_i^t \nabla_{\theta} L_T^i(\theta_t) \right\|^2 \right) + \sum_{t=0}^{T-1} \left( (\nabla_{\theta} L_w(\theta_t) - \nabla_{\theta} L(\theta_t))^T (\theta_t - \theta^*) \right) \quad (13)$$

Since,  $\|L_T(\theta)\| \leq \sigma_T$ , we have  $\left\| \alpha \sum_{i \in \mathcal{X}^t} w_i^t \nabla_{\theta} L_T^i(\theta_t) \right\| \leq \sum_{i=1}^{|\mathcal{X}^t|} w_i^t \sigma$ . Assuming that the weights at every iteration are normalized such that  $\forall_{t \in [1, T]} \sum_{i=1}^{|\mathcal{X}^t|} w_i^t = 1$  and the training and validation loss gradients are normalized as well, we have  $\left\| \alpha \sum_{i \in \mathcal{X}^t} w_i^t \nabla_{\theta} L_T^i(\theta_t) \right\| \leq \sigma_T$ . Also assuming that  $\|\theta - \theta^*\| \leq D$ , we have,

$$\sum_{t=0}^{T-1} L(\theta_t) - L(\theta^*) \leq \frac{D^2}{2\alpha} + \frac{T\alpha\sigma_T^2}{2} + \sum_{t=0}^{T-1} D (\|\nabla_{\theta} L_w(\theta_t) - \nabla_{\theta} L(\theta_t)\|) \quad (14)$$

$$\frac{\sum_{t=0}^{T-1} L(\theta_t) - L(\theta^*)}{T} \leq \frac{D^2}{2\alpha T} + \frac{\alpha\sigma_T^2}{2} + \sum_{t=0}^{T-1} \frac{D}{T} (\|\nabla_{\theta} L_w(\theta_t) - \nabla_{\theta} L(\theta_t)\|) \quad (15)$$

Since,  $\min(L(\theta_t) - L(\theta^*)) \leq \frac{\sum_{t=0}^{T-1} L(\theta_t) - L(\theta^*)}{T}$ , we have:

$$\min(L(\theta_t) - L(\theta^*)) \leq \frac{D^2}{2\alpha T} + \frac{\alpha\sigma_T^2}{2} + \sum_{t=0}^{T-1} \frac{D}{T} (\|\nabla_{\theta} L_w(\theta_t) - \nabla_{\theta} L(\theta_t)\|) \quad (16)$$

Substituting  $L_w(\theta_t) = \sum_{i \in \mathcal{X}^t} w_i^t L_T^i(\theta_t)$  in the above equation we have,

$$\min(L(\theta_t) - L(\theta^*)) \leq \frac{D^2}{2\alpha T} + \frac{\alpha\sigma_T^2}{2} + \sum_{t=0}^{T-1} \frac{D}{T} \left( \left\| \sum_{i \in \mathcal{X}^t} w_i^t \nabla_{\theta} L_T^i(\theta_t) - \nabla_{\theta} L(\theta_t) \right\| \right) \quad (17)$$

Choosing  $\alpha = \frac{D}{\sigma_T \sqrt{T}}$ , we have:

$$\min(L(\theta_t) - L(\theta^*)) \leq \frac{D\sigma_T}{\sqrt{T}} + \sum_{t=0}^{T-1} \frac{D}{T} \left( \left\| \sum_{i \in \mathcal{X}^t} w_i^t \nabla_{\theta} L_T^i(\theta_t) - \nabla_{\theta} L(\theta_t) \right\| \right) \quad (18)$$

**Case 2  $L_T$  is lipschitz smooth with parameter  $\mathcal{L}_T$ , and  $\forall i, L_T^i$  satisfies  $0 \leq L_T^i(\theta) \leq \beta_T$** 

Since  $L_w(\theta_t) = \sum_{i \in \mathcal{X}^t} w_i^t L_T^i(\theta_t)$ , from the additive property of lipschitz smooth functions we can say that  $L_w(\theta_t)$  is also lipschitz smooth with constant  $\sum_{i \in \mathcal{X}^t} w_i^t \mathcal{L}_T$ . Assuming that the weights at every iteration are normalized such that

$\forall_{t \in [0, T]} \sum_{i=1}^{|\mathcal{X}^t|} w_i^t = 1$ , we can say that  $L_w(\theta_t)$  is lipschitz smooth with constant  $\mathcal{L}_T$ .

From lipschitz smoothness of function  $L_w(\theta)$ , we have:

$$L_w(\theta_{t+1}) \leq L_w(\theta_t) + \nabla_{\theta} L_w(\theta_t)^T (\theta_{t+1} - \theta_t) + \frac{L}{2} \|\theta_{t+1} - \theta_t\|^2 \quad (19)$$

Since  $\theta_{t+1} - \theta_t = -\alpha \nabla_{\theta} L_w(\theta_t)$ , we have:

$$L_w(\theta_{t+1}) \leq L_w(\theta_t) - \alpha \nabla_{\theta} L_w(\theta_t)^T \nabla_{\theta} L_w(\theta_t) + \frac{\mathcal{L}_T}{2} \|\alpha \nabla_{\theta} L_w(\theta_t)\|^2 \quad (20)$$

$$L_w(\theta_{t+1}) \leq L_w(\theta_t) + \frac{\mathcal{L}_T \alpha^2 - 2\alpha}{2} \|\nabla_\theta L_w(\theta_t)\|^2 \quad (21)$$

Choosing  $\alpha = \frac{1}{\mathcal{L}_T}$ , we have:

$$L_w(\theta_{t+1}) \leq L_w(\theta_t) - \frac{1}{2\mathcal{L}_T} \|\nabla_\theta L_w(\theta_t)\|^2 \quad (22)$$

Since  $\nabla_\theta L_w(\theta_T) = \sum_{i \in \mathcal{X}^t} w_i^t \nabla_\theta L_T^i(\theta_t)$ , we have:

$$L_w(\theta_{t+1}) \leq L_w(\theta_t) - \frac{1}{2\mathcal{L}_T} \left\| \sum_{i \in \mathcal{X}^t} w_i^t \nabla_\theta L_T^i(\theta_t) \right\|^2 \quad (23)$$

$$\frac{1}{2\mathcal{L}_T} \left\| \sum_{i \in \mathcal{X}^t} w_i^t \nabla_\theta L_T^i(\theta_t) \right\|^2 \leq L_w(\theta_t) - L_w(\theta_{t+1}) \quad (24)$$

Summing the above equation for different values of  $t$  in  $[0, T-1]$ , we have:

$$\sum_{t=0}^{t=T-1} \frac{1}{2\mathcal{L}_T} \left\| \sum_{i \in \mathcal{X}^t} w_i^t \nabla_\theta L_T^i(\theta_t) \right\|^2 \leq \sum_{t=0}^{t=T-1} (L_w(\theta_t) - L_w(\theta_{t+1})) \quad (25)$$

$$\sum_{t=0}^{t=T-1} \frac{1}{2\mathcal{L}_T} \left\| \sum_{i \in \mathcal{X}^t} w_i^t \nabla_\theta L_T^i(\theta_t) \right\|^2 \leq L_w(\theta_0) - L_w(\theta_T) \quad (26)$$

Substituting  $\alpha = \frac{1}{\mathcal{L}_T}$  in Equation 12, we have:

$$\sum_{t=0}^{T-1} \nabla_\theta L(\theta_t)^T (\theta_t - \theta^*) \leq \frac{\mathcal{L}_T}{2} \|\theta_0 - \theta^*\|^2 + \sum_{t=0}^{T-1} \left( \frac{1}{2\mathcal{L}_T} \left\| \sum_{i \in \mathcal{X}^t} w_i^t \nabla_\theta L_T^i(\theta_t) \right\|^2 \right) + \sum_{t=0}^{T-1} \left( (\nabla_\theta L_w(\theta_t) - \nabla_\theta L(\theta_t))^T (\theta_t - \theta^*) \right) \quad (27)$$

Substituting Equation 26, we have:

$$\sum_{t=0}^{T-1} \nabla_\theta L(\theta_t)^T (\theta_t - \theta^*) \leq \frac{\mathcal{L}_T}{2} \|\theta_0 - \theta^*\|^2 + L_w(\theta_0) - L_w(\theta_T) + \sum_{t=0}^{T-1} \left( (\nabla_\theta L_w(\theta_t) - \nabla_\theta L(\theta_t))^T (\theta_t - \theta^*) \right) \quad (28)$$

$$\sum_{t=0}^{T-1} \nabla_\theta L(\theta_t)^T (\theta_t - \theta^*) \leq \frac{\mathcal{L}_T}{2} \|\theta_0 - \theta^*\|^2 + L_w(\theta_0) + \sum_{t=0}^{T-1} \left( (\nabla_\theta L_w(\theta_t) - \nabla_\theta L(\theta_t))^T (\theta_t - \theta^*) \right) \quad (29)$$

Since  $L_T(\theta)$  is bounded by  $\beta_T$ , we have  $L_w(\theta) = \sum_{i \in \mathcal{X}^t} w_i^t L_T^i(\theta)$  bounded by  $\beta_T$  as the weights are normalized to 1 every epoch (i.e.,  $\forall_{t \in [0, T]} \sum_{i=1}^{|\mathcal{X}^t|} w_i^t = 1$ ).

$$\sum_{t=0}^{T-1} \nabla_\theta L(\theta_t)^T (\theta_t - \theta^*) \leq \frac{\mathcal{L}_T}{2} \|\theta_0 - \theta^*\|^2 + \beta_T + \sum_{t=0}^{T-1} \left( (\nabla_\theta L_w(\theta_t) - \nabla_\theta L(\theta_t))^T (\theta_t - \theta^*) \right) \quad (30)$$

Dividing the above equation by  $T$ , we have:

$$\frac{\sum_{t=0}^{T-1} \nabla_{\theta} L(\theta_t)^T (\theta_t - \theta^*)}{T} \leq \frac{\mathcal{L}_T}{2T} \|\theta_0 - \theta^*\|^2 + \frac{\beta_T}{T} + \frac{\sum_{t=0}^{T-1} \left( (\nabla_{\theta} L_w(\theta_t) - \nabla_{\theta} L(\theta_t))^T (\theta_t - \theta^*) \right)}{T} \quad (31)$$

Since  $\|\theta - \theta^*\| \leq D$ , we have,

$$\frac{\sum_{t=0}^{T-1} \nabla_{\theta} L(\theta_t)^T (\theta_t - \theta^*)}{T} \leq \frac{D^2 \mathcal{L}_T}{2T} + \frac{\beta_T}{T} + \frac{D}{T} \sum_{t=0}^{T-1} (\|\nabla_{\theta} L_w(\theta_t) - \nabla_{\theta} L(\theta_t)\|) \quad (32)$$

From convexity of function  $L(\theta)$ , we know  $L(\theta_t) - L(\theta^*) \leq \nabla_{\theta} L(\theta_t)^T (\theta_t - \theta^*)$ . Combining this with above equation we have,

$$\frac{\sum_{t=0}^{T-1} L(\theta_t) - L(\theta^*)}{T} \leq \frac{D^2 \mathcal{L}_T}{2T} + \frac{\beta_T}{T} + \frac{D}{T} \sum_{t=0}^{T-1} (\|\nabla_{\theta} L_w(\theta_t) - \nabla_{\theta} L(\theta_t)\|) \quad (33)$$

Since,  $\min(L(\theta_t) - L(\theta^*)) \leq \frac{\sum_{t=0}^{T-1} L(\theta_t) - L(\theta^*)}{T}$ , we have:

$$\min(L(\theta_t) - L(\theta^*)) \leq \frac{D^2 \mathcal{L}_T}{2T} + \frac{\beta_T}{T} + \frac{D}{T} \sum_{t=0}^{T-1} (\|\nabla_{\theta} L_w(\theta_t) - \nabla_{\theta} L(\theta_t)\|) \quad (34)$$

Substituting  $L_w(\theta_t) = \sum_{i \in \mathcal{X}^t} w_i^t L_T^i(\theta_t)$  in the above equation we have,

$$\min(L(\theta_t) - L(\theta^*)) \leq \frac{D^2 \mathcal{L}_T}{2T} + \frac{\beta_T}{T} + \frac{D}{T} \sum_{t=0}^{T-1} \left( \left\| \sum_{i \in \mathcal{X}^t} w_i^t \nabla_{\theta} L_T^i(\theta_t) - \nabla_{\theta} L(\theta_t) \right\| \right) \quad (35)$$

**Case 3  $L_T$  is Lipschitz continuous (parameter  $\sigma_T$ ) and  $L$  is strongly convex with parameter  $\mu$**

Let the learning at time step  $t$  be  $\alpha_t$

From Equation 11, we have:

$$\nabla_{\theta} L(\theta_t)^T (\theta_t - \theta^*) = \frac{1}{2\alpha_t} \left( \left\| \alpha_t \sum_{i \in \mathcal{X}^t} w_i^t \nabla_{\theta} L_T^i(\theta_t) \right\|^2 + \|\theta_t - \theta^*\|^2 - \|\theta_{t+1} - \theta^*\|^2 \right) - (\nabla_{\theta} L_w(\theta_t) - \nabla_{\theta} L(\theta_t))^T (\theta_t - \theta^*) \quad (36)$$

From the strong convexity of loss function  $L$ , we have:

$$\nabla_{\theta} L(\theta_t)^T (\theta_t - \theta^*) \geq L(\theta_t) - L(\theta^*) + \frac{\mu}{2} \|\theta_t - \theta^*\|^2 \quad (37)$$

Combining the above two equations, we have:

$$L(\theta_t) - L(\theta^*) = \frac{1}{2\alpha_t} \left( \left\| \alpha_t \sum_{i \in \mathcal{X}^t} w_i^t \nabla_{\theta} L_T^i(\theta_t) \right\|^2 + \|\theta_t - \theta^*\|^2 - \|\theta_{t+1} - \theta^*\|^2 \right) - (\nabla_{\theta} L_w(\theta_t) - \nabla_{\theta} L(\theta_t))^T (\theta_t - \theta^*) - \frac{\mu}{2} \|\theta_t - \theta^*\|^2 \quad (38)$$

$$L(\theta_t) - L(\theta^*) = \frac{\alpha_t}{2} \left\| \sum_{i \in \mathcal{X}^t} w_i^t \nabla_{\theta} L_T^i(\theta_t) \right\|^2 + \frac{\alpha_t^{-1} - \mu}{2} \|\theta_t - \theta^*\|^2 - \frac{\alpha_t^{-1}}{2} \|\theta_{t+1} - \theta^*\|^2 - (\nabla_{\theta} L_w(\theta_t) - \nabla_{\theta} L(\theta_t))^T (\theta_t - \theta^*) \quad (39)$$

Setting an learning rate of  $\alpha_t = \frac{2}{\mu(t+1)}$  and multiplying by  $t$  on both sides, we have:

$$t(L(\theta_t) - L(\theta^*)) = \frac{t}{\mu(t+1)} \left\| \sum_{i \in \mathcal{X}^t} w_i^t \nabla_{\theta} L_T^i(\theta_t) \right\|^2 + \frac{\mu t(t-1)}{4} \|\theta_t - \theta^*\|^2 - \frac{\mu t(t+1)}{4} \|\theta_{t+1} - \theta^*\|^2 - t(\nabla_{\theta} L_w(\theta_t) - \nabla_{\theta} L(\theta_t))^T (\theta_t - \theta^*) \quad (40)$$

Since,  $\|L_T(\theta)\| \leq \sigma_T$ , we have  $\left\| \alpha \sum_{i \in \mathcal{X}^t} w_i^t \nabla_{\theta} L_T^i(\theta_t) \right\| \leq \sum_{i=1}^{|\mathcal{X}^t|} w_i^t \sigma_T$ . Assuming that the weights at every iteration are normalized such that  $\forall_{t \in [1, T]} \sum_{i=1}^{|\mathcal{X}^t|} w_i^t = 1$  and the training and validation loss gradients are normalized as well, we have  $\left\| \alpha \sum_{i \in \mathcal{X}^t} w_i^t \nabla_{\theta} L_T^i(\theta_t) \right\| \leq \sigma_T$ . Also assuming that  $\|\theta - \theta^*\| \leq D$ , we have,

$$t(L(\theta_t) - L(\theta^*)) = \frac{\sigma_T^2 t}{\mu(t+1)} + \frac{\mu t(t-1)}{4} \|\theta_t - \theta^*\|^2 - \frac{\mu t(t+1)}{4} \|\theta_{t+1} - \theta^*\|^2 + Dt \|\nabla_{\theta} L_w(\theta_t) - \nabla_{\theta} L(\theta_t)\| \quad (41)$$

Summing the above equation from  $t = 1, \dots, T$ , we have:

$$\sum_{t=1}^{t=T} t(L(\theta_t) - L(\theta^*)) = \sum_{t=1}^{t=T} \frac{\sigma_T^2 t}{\mu(t+1)} + \sum_{t=1}^{t=T} \frac{\mu t(t-1)}{4} \|\theta_t - \theta^*\|^2 - \sum_{t=1}^{t=T} \frac{\mu t(t+1)}{4} \|\theta_{t+1} - \theta^*\|^2 + \sum_{t=1}^{t=T} Dt \|\nabla_{\theta} L_w(\theta_t) - \nabla_{\theta} L(\theta_t)\| \quad (42)$$

$$\sum_{t=1}^{t=T} t(L(\theta_t) - L(\theta^*)) \leq \sum_{t=1}^{t=T} \frac{\sigma_T^2}{\mu} + \sum_{t=1}^{t=T} \frac{\mu t(t-1)}{4} \|\theta_t - \theta^*\|^2 - \sum_{t=1}^{t=T} \frac{\mu t(t+1)}{4} \|\theta_{t+1} - \theta^*\|^2 + \sum_{t=1}^{t=T} Dt \|\nabla_{\theta} L_w(\theta_t) - \nabla_{\theta} L(\theta_t)\| \quad (43)$$

$$\sum_{t=1}^{t=T} t(L(\theta_t) - L(\theta^*)) \leq \frac{\sigma_T^2 T}{\mu} + \frac{\mu}{4} (0 - T(T+1) \|\theta_{T+1} - \theta^*\|^2) + \sum_{t=1}^{t=T} Dt \|\nabla_{\theta} L_w(\theta_t) - \nabla_{\theta} L(\theta_t)\| \quad (44)$$

Since  $\frac{\mu}{4} (0 - T(T+1) \|\theta_{T+1} - \theta^*\|^2) \leq 0$ , we have:

$$\sum_{t=1}^{t=T} t(L(\theta_t) - L(\theta^*)) \leq \frac{\sigma_T^2 T}{\mu} + \sum_{t=1}^{t=T} Dt \|\nabla_{\theta} L_w(\theta_t) - \nabla_{\theta} L(\theta_t)\| \quad (45)$$

Since,  $L(\theta_t) - L(\theta^*) \leq \min_{t=1:T} L(\theta_t) - L(\theta^*)$  and multiplying the above equation by  $\frac{2}{T(T+1)}$ , we have:

$$\frac{2}{T(T+1)} \sum_{t=1}^{t=T} t(\min_{t=1:T} L(\theta_t) - L(\theta^*)) \leq \frac{2}{T(T+1)} \frac{\sigma_T^2 T}{\mu} + \frac{2}{T(T+1)} \sum_{t=1}^{t=T} Dt \|\nabla_{\theta} L_w(\theta_t) - \nabla_{\theta} L(\theta_t)\| \quad (46)$$

This in turn implies:

$$\min_{t=1:T} L(\theta_t) - L(\theta^*) \leq \frac{\sigma_T^2 2}{\mu(T+1)} + \sum_{t=1}^{t=T} \frac{2Dt}{T(T+1)} \|\nabla_{\theta} L_w(\theta_t) - \nabla_{\theta} L(\theta_t)\| \quad (47)$$

## B.2. Convergence Analysis with Stochastic Gradient Descent

**Theorem** Denote  $L_V$  as the validation loss,  $L_T$  as the full training loss, and that the parameters satisfy  $\|\theta\|^2 \leq D^2$ . Let  $L$  denote either the training or validation loss (with gradient bounded by  $\sigma$ ). Any adaptive data selection algorithm, defined via weights  $\mathbf{w}^t$  and subsets  $\mathcal{X}^t$  for  $t = 1, \dots, T$ , and run with a learning rate  $\alpha$  using stochastic gradient descent enjoys the following convergence bounds:

- if  $L_T$  is Lipschitz continuous and  $\alpha = \frac{D}{\sigma_T \sqrt{T}}$ , then  $\mathbb{E}(\min_{t=1:T} L(\theta_t)) - L(\theta^*) \leq \frac{D\sigma_T}{\sqrt{T}} + \frac{D}{T} \sum_{t=1}^{T-1} \mathbb{E}(\text{Err}(\mathbf{w}^t, \mathcal{X}^t, L, L_T, \theta_t))$
- if  $L_T$  is Lipschitz continuous,  $L$  is strongly convex with a strong convexity parameter  $\mu$ , then setting a learning rate  $\alpha_t = \frac{2}{\mu(1+t)}$ , then  $\mathbb{E}(\min_{t=1:T} L(\theta_t)) - L(\theta^*) \leq \frac{\sigma_T^2 2}{\mu(T+1)} + \sum_{t=1}^{T-1} \frac{2D}{T(T+1)} \mathbb{E}(t \text{Err}(\mathbf{w}^t, \mathcal{X}^t, L, L_T, \theta_t))$

where:

$$\text{Err}(\mathbf{w}^t, \mathcal{X}^t, L, L_T, \theta_t) = \left\| \sum_{i \in \mathcal{X}^t} w_i^t \nabla_{\theta} L_T^i(\theta_t) - \nabla_{\theta} L(\theta_t) \right\|$$

PROOF Suppose the gradients of validation loss and training loss are sigma bounded by  $\sigma_V$  and  $\sigma_T$  respectively. Let  $\theta_t$  be the model parameters at epoch  $t$  and  $\theta^*$  be the optimal model parameters. Let  $\alpha_t$  is the learning rate at epoch  $t$ .

Let  $L_w(\theta_t) = \sum_{i \in \mathcal{X}^t} w_i^t L_T^i(\theta_t)$  be the weighted training loss where  $L_T^i(\theta_t)$  is the training loss of the  $i^{\text{th}}$  instance in the subset  $\mathcal{X}^t$ .

Let  $\nabla_{\theta} L_w^i(\theta_t)$  be the weighted training loss gradient of the  $i^{\text{th}}$  instance in the subset  $\mathcal{X}^t$ , we have:

$$\nabla_{\theta} L_w^i(\theta_t) = w_i^t \nabla_{\theta} L_T^i(\theta_t)$$

For a particular  $\theta_t$ , conditional expectation of  $\nabla_{\theta} L_w^i(\theta_t)$  given  $\theta = \theta_t$  over the random choice of  $i$  (i.e., randomly selecting  $i^{\text{th}}$  sample from the subset  $\mathcal{X}^t$ ) yields:

$$\begin{aligned} \mathbb{E}(\nabla_{\theta} L_w^i(\theta_t) \mid \theta = \theta_t) &= \sum_{i \in \mathcal{X}^t} \nabla_{\theta} w_i^t L_T^i(\theta_t) \\ &= \nabla_{\theta} L_w(\theta_t) \end{aligned} \quad (48)$$

In the above equation,  $\mathbf{w}^t$  can be assumed as weighted probability distribution as  $\sum_{i \in \mathcal{X}^t} w_i^t = 1$ .

Similarly conditional expectation of  $\nabla_{\theta} L_w^i(\theta_t)^T(\theta_t - \theta^*)$  given  $\theta = \theta_t$  is,

$$\mathbb{E}(\nabla_{\theta} L_w^i(\theta_t)^T(\theta_t - \theta^*) \mid \theta = \theta_t) = \nabla_{\theta} L_w(\theta_t)^T(\theta_t - \theta^*) \quad (49)$$

Using the fact that  $\theta = \theta_t$  can occur for  $\theta$  in some finite set  $\Theta$  (i.e., one element for every choice of samples through out all iterations), we have:

$$\begin{aligned} \mathbb{E}(\nabla_{\theta} L_w^i(\theta_t)^T(\theta_t - \theta^*)) &= \sum_{\theta_t \in \Theta} \mathbb{E}(\nabla_{\theta} L_w^i(\theta_t)^T(\theta_t - \theta^*)) \text{prob}(\theta = \theta_t) \\ &= \sum_{\theta_t \in \Theta} \nabla_{\theta} L_w(\theta_t)^T(\theta_t - \theta^*) \text{prob}(\theta = \theta_t) \\ &= \mathbb{E}(\nabla_{\theta} L_w(\theta_T)^T(\theta_t - \theta^*)) \end{aligned} \quad (50)$$

From the definition of stochastic gradient descent, we have:

$$\nabla_{\theta} L_w^i(\theta_t)^T(\theta_t - \theta^*) = \frac{1}{\alpha_t} (\theta_t - \theta_{t+1})^T(\theta_t - \theta^*) \quad (51)$$

$$\nabla_{\theta} L_w^i(\theta_t)^T(\theta_t - \theta^*) = \frac{1}{2\alpha_t} \left( \|\theta_t - \theta_{t+1}\|^2 + \|\theta_t - \theta^*\|^2 - \|\theta_{t+1} - \theta^*\|^2 \right) \quad (52)$$

$$\nabla_{\theta} L_w^i(\theta_t)^T (\theta_t - \theta^*) = \frac{1}{2\alpha_t} \left( \|\alpha_t \nabla_{\theta} L_w^i(\theta_t)\|^2 + \|\theta_t - \theta^*\|^2 - \|\theta_{t+1} - \theta^*\|^2 \right) \quad (53)$$

We can rewrite the function  $\nabla_{\theta} L_w^i(\theta_t)^T (\theta_t - \theta^*)$  as follows:

$$\nabla_{\theta} L_w^i(\theta_t)^T (\theta_t - \theta^*) = \nabla_{\theta} L_w^i(\theta_t)^T (\theta_t - \theta^*) - \nabla_{\theta} L(\theta_t)^T (\theta_t - \theta^*) + \nabla_{\theta} L(\theta_t)^T (\theta_t - \theta^*) \quad (54)$$

Combining the equations Equation 53 ,Equation 54 we have,

$$\nabla_{\theta} L_w^i(\theta_t)^T (\theta_t - \theta^*) - \nabla_{\theta} L(\theta_t)^T (\theta_t - \theta^*) + \nabla_{\theta} L(\theta_t)^T (\theta_t - \theta^*) = \frac{1}{2\alpha_t} \left( \|\alpha_t \nabla_{\theta} L_w^i(\theta_t)\|^2 + \|\theta_t - \theta^*\|^2 - \|\theta_{t+1} - \theta^*\|^2 \right) \quad (55)$$

$$\nabla_{\theta} L(\theta_t)^T (\theta_t - \theta^*) = \frac{1}{2\alpha_t} \left( \|\alpha_t \nabla_{\theta} L_w^i(\theta_t)\|^2 + \|\theta_t - \theta^*\|^2 - \|\theta_{t+1} - \theta^*\|^2 \right) - (\nabla_{\theta} L_w^i(\theta_t) - \nabla_{\theta} L(\theta_t))^T (\theta_t - \theta^*) \quad (56)$$

Taking expectation on both sides of the above equation, we have:

$$\begin{aligned} \mathbb{E}(\nabla_{\theta} L(\theta_t)^T (\theta_t - \theta^*)) &= \frac{1}{2\alpha_t} \mathbb{E} \left( \|\alpha_t \nabla_{\theta} L_w^i(\theta_t)\|^2 \right) + \frac{1}{2\alpha_t} \mathbb{E} \left( \|\theta_t - \theta^*\|^2 \right) \\ &\quad - \frac{1}{2\alpha_t} \mathbb{E} \left( \|\theta_{t+1} - \theta^*\|^2 \right) - \mathbb{E} \left( (\nabla_{\theta} L_w^i(\theta_t) - \nabla_{\theta} L(\theta_t))^T (\theta_t - \theta^*) \right) \end{aligned} \quad (57)$$

From Equation 50, we know that  $\mathbb{E}(\nabla_{\theta} L_w^i(\theta_t)^T (\theta_t - \theta^*)) = \mathbb{E}(\nabla_{\theta} L_w(\theta_T)^T (\theta_t - \theta^*))$ . Substituting it in the above equation, we have:

$$\begin{aligned} \mathbb{E}(\nabla_{\theta} L(\theta_t)^T (\theta_t - \theta^*)) &= \frac{1}{2\alpha_t} \mathbb{E} \left( \|\alpha_t \nabla_{\theta} L_w(\theta_t)\|^2 \right) + \frac{1}{2\alpha_t} \mathbb{E} \left( \|\theta_t - \theta^*\|^2 \right) \\ &\quad - \frac{1}{2\alpha_t} \mathbb{E} \left( \|\theta_{t+1} - \theta^*\|^2 \right) - \mathbb{E} \left( (\nabla_{\theta} L_w(\theta_t) - \nabla_{\theta} L(\theta_t))^T (\theta_t - \theta^*) \right) \end{aligned} \quad (58)$$

*Case 1  $L_T$  is lipschitz continuous with parameter  $\sigma_T$  (i.e.,  $\|\nabla_{\theta} L_T(\theta)\| \leq \sigma_T$ )*

From convexity of function  $L(\theta)$ , we know  $L(\theta_t) - L(\theta^*) \leq \nabla_{\theta} L(\theta_t)^T (\theta_t - \theta^*)$ . Combining this with Equation 58 we have,

$$\begin{aligned} \mathbb{E}(L(\theta_t) - L(\theta^*)) &\leq \frac{1}{2\alpha_t} \mathbb{E} \left( \|\alpha_t \nabla_{\theta} L_w(\theta_t)\|^2 \right) + \frac{1}{2\alpha_t} \mathbb{E} \left( \|\theta_t - \theta^*\|^2 \right) \\ &\quad - \frac{1}{2\alpha_t} \mathbb{E} \left( \|\theta_{t+1} - \theta^*\|^2 \right) - \mathbb{E} \left( (\nabla_{\theta} L_w(\theta_t) - \nabla_{\theta} L(\theta_t))^T (\theta_t - \theta^*) \right) \end{aligned} \quad (59)$$

Summing up the above equation from  $t = 0 \dots T - 1$ , we have:

$$\begin{aligned} \sum_{t=0}^{T-1} \mathbb{E}(L(\theta_t) - L(\theta^*)) &\leq \sum_{t=0}^{T-1} \frac{1}{2\alpha_t} \mathbb{E} \left( \|\alpha_t \nabla_{\theta} L_w(\theta_t)\|^2 \right) + \frac{1}{2\alpha_t} \sum_{t=0}^{T-1} \mathbb{E} \left( \|\theta_t - \theta^*\|^2 \right) \\ &\quad - \frac{1}{2\alpha_t} \sum_{t=0}^{T-1} \mathbb{E} \left( \|\theta_{t+1} - \theta^*\|^2 \right) - \sum_{t=0}^{T-1} \mathbb{E} \left( (\nabla_{\theta} L_w(\theta_t) - \nabla_{\theta} L(\theta_t))^T (\theta_t - \theta^*) \right) \end{aligned} \quad (60)$$

Since  $\mathbb{E}(\|\nabla_{\theta} L_T(\theta)\|) \leq \sigma_T$ , we have  $\mathbb{E}(\|\nabla_{\theta} L_w(\theta)\|) \leq \sigma_T$  as the weights are normalized to 1. Substituting it in the



above equation, we have:

$$\begin{aligned} \sum_{t=0}^{T-1} \mathbb{E}(L(\theta_t) - L(\theta^*)) &\leq \sum_{t=0}^{T-1} \frac{\alpha_t \sigma_T^2}{2} + \frac{1}{2\alpha_t} \sum_{t=0}^{T-1} \mathbb{E}(\|\theta_t - \theta^*\|^2) \\ &\quad - \frac{1}{2\alpha_t} \sum_{t=0}^{T-1} \mathbb{E}(\|\theta_{t+1} - \theta^*\|^2) - \sum_{t=0}^{T-1} \mathbb{E}((\nabla_{\theta} L_w(\theta_t) - \nabla_{\theta} L(\theta_t))^T (\theta_t - \theta^*)) \end{aligned} \quad (61)$$

$$\begin{aligned} \sum_{t=0}^{T-1} \mathbb{E}(L(\theta_t) - L(\theta^*)) &\leq \sum_{t=0}^{T-1} \frac{\alpha_t \sigma_T^2}{2} + \frac{1}{2\alpha_t} \mathbb{E}(\|\theta_0 - \theta^*\|^2) \\ &\quad - \frac{1}{2\alpha_t} \mathbb{E}(\|\theta_T - \theta^*\|^2) - \sum_{t=0}^{T-1} \mathbb{E}((\nabla_{\theta} L_w(\theta_t) - \nabla_{\theta} L(\theta_t))^T (\theta_t - \theta^*)) \end{aligned} \quad (62)$$

Since  $\mathbb{E}(\|\theta_T - \theta^*\|^2) \geq 0$ , we have:

$$\sum_{t=0}^{T-1} \mathbb{E}(L(\theta_t) - L(\theta^*)) \leq \sum_{t=0}^{T-1} \frac{\alpha_t \sigma_T^2}{2} + \frac{1}{2\alpha_t} \mathbb{E}(\|\theta_0 - \theta^*\|^2) - \sum_{t=0}^{T-1} \mathbb{E}((\nabla_{\theta} L_w(\theta_t) - \nabla_{\theta} L(\theta_t))^T (\theta_t - \theta^*)) \quad (63)$$

Also assuming that  $\|\theta - \theta^*\| \leq D$ , we have,

$$\sum_{t=0}^{T-1} \mathbb{E}(L(\theta_t) - L(\theta^*)) \leq \frac{\alpha_t T \sigma_T^2}{2} + \frac{D^2}{2\alpha_t} - D \sum_{t=0}^{T-1} \mathbb{E}(\|\nabla_{\theta} L_w(\theta_t) - \nabla_{\theta} L(\theta_t)\|) \quad (64)$$

Choosing a constant learning rate of  $\alpha_t = \frac{D}{\sigma_T \sqrt{T}}$ , we have:

$$\sum_{t=0}^{T-1} \mathbb{E}(L(\theta_t) - L(\theta^*)) \leq \frac{D \sigma_T \sqrt{T}}{2} + \frac{D \sigma_T \sqrt{T}}{2} - D \sum_{t=0}^{T-1} \mathbb{E}(\|\nabla_{\theta} L_w(\theta_t) - \nabla_{\theta} L(\theta_t)\|) \quad (65)$$

Since,  $L(\theta_t) - L(\theta^*) \leq \min_{t=1:T} L(\theta_t) - L(\theta^*)$ , we have:

$$\sum_{t=0}^{T-1} \mathbb{E}(\min_{t=1:T} L(\theta_t) - L(\theta^*)) \leq \frac{D \sigma_T \sqrt{T}}{2} + \frac{D \sigma_T \sqrt{T}}{2} - D \sum_{t=0}^{T-1} \mathbb{E}(\|\nabla_{\theta} L_w(\theta_t) - \nabla_{\theta} L(\theta_t)\|) \quad (66)$$

Dividing the above equation by  $T$  in the both sides, we have:

$$\frac{1}{T} \sum_{t=0}^{T-1} \mathbb{E}(\min_{t=1:T} L(\theta_t) - L(\theta^*)) \leq \sum_{t=0}^{T-1} \frac{D \sigma_T}{\sqrt{T}} - \frac{D}{T} \sum_{t=0}^{T-1} \mathbb{E}(\|\nabla_{\theta} L_w(\theta_t) - \nabla_{\theta} L(\theta_t)\|) \quad (67)$$

$$\mathbb{E}(\min_{t=1:T} L(\theta_t) - L(\theta^*)) \leq \sum_{t=0}^{T-1} \frac{D \sigma_T}{\sqrt{T}} - \frac{D}{T} \sum_{t=0}^{T-1} \mathbb{E}(\|\nabla_{\theta} L_w(\theta_t) - \nabla_{\theta} L(\theta_t)\|) \quad (68)$$

Substituting  $\nabla_{\theta} L_w(\theta_t) = \sum_{i \in \mathcal{X}^t} w_i^t \nabla_{\theta} L_T^i(\theta_t)$ , we have:

$$\mathbb{E}(\min_{t=1:T} L(\theta_t) - L(\theta^*)) \leq \sum_{t=0}^{T-1} \frac{D \sigma_T}{\sqrt{T}} - \frac{D}{T} \sum_{t=0}^{T-1} \mathbb{E} \left( \left\| \sum_{i \in \mathcal{X}^t} w_i^t \nabla_{\theta} L_T^i(\theta_t) - \nabla_{\theta} L(\theta_t) \right\| \right) \quad (69)$$

Case 2  $L_T$  is Lipschitz continuous,  $L$  is strongly convex with a strong convexity parameter  $\mu$

From strong convexity of function  $L(\theta)$ , we have:

$$\mathbb{E} \left( \nabla_{\theta} L(\theta_t)^T (\theta_t - \theta^*) \right) \geq \mathbb{E} (L(\theta_t) - L(\theta^*)) + \frac{\mu}{2} \mathbb{E} (\|\theta_t - \theta^*\|) \quad (70)$$

Combining the above equation with Equation 58, we have:

$$\begin{aligned} \mathbb{E} (L(\theta_t) - L(\theta^*)) + \frac{\mu}{2} \mathbb{E} (\|\theta_t - \theta^*\|) &\leq \frac{1}{2\alpha_t} \mathbb{E} \left( \|\alpha_t \nabla_{\theta} L_w(\theta_t)\|^2 \right) + \frac{1}{2\alpha_t} \mathbb{E} \left( \|\theta_t - \theta^*\|^2 \right) \\ &\quad - \frac{1}{2\alpha_t} \mathbb{E} \left( \|\theta_{t+1} - \theta^*\|^2 \right) - \mathbb{E} \left( (\nabla_{\theta} L_w(\theta_t) - \nabla_{\theta} L(\theta_t))^T (\theta_t - \theta^*) \right) \end{aligned} \quad (71)$$

$$\begin{aligned} \mathbb{E} (L(\theta_t) - L(\theta^*)) &\leq \frac{1}{2\alpha_t} \mathbb{E} \left( \|\alpha_t \nabla_{\theta} L_w(\theta_t)\|^2 \right) + \frac{1}{2\alpha_t} \mathbb{E} \left( \|\theta_t - \theta^*\|^2 \right) \\ &\quad - \frac{1}{2\alpha_t} \mathbb{E} \left( \|\theta_{t+1} - \theta^*\|^2 \right) - \mathbb{E} \left( (\nabla_{\theta} L_w(\theta_t) - \nabla_{\theta} L(\theta_t))^T (\theta_t - \theta^*) \right) - \frac{\mu}{2} \mathbb{E} (\|\theta_t - \theta^*\|) \end{aligned} \quad (72)$$

$$\begin{aligned} \mathbb{E} (L(\theta_t) - L(\theta^*)) &\leq \frac{1}{2\alpha_t} \mathbb{E} \left( \|\alpha_t \nabla_{\theta} L_w(\theta_t)\|^2 \right) + \frac{\alpha_t^{-1} - \mu}{2} \mathbb{E} \left( \|\theta_t - \theta^*\|^2 \right) \\ &\quad - \frac{\alpha_t^{-1}}{2} \mathbb{E} \left( \|\theta_{t+1} - \theta^*\|^2 \right) - \mathbb{E} \left( (\nabla_{\theta} L_w(\theta_t) - \nabla_{\theta} L(\theta_t))^T (\theta_t - \theta^*) \right) \end{aligned} \quad (73)$$

Setting an learning rate of  $\alpha_t = \frac{2}{\mu(t+1)}$ , multiplying by  $t$  on both sides and substituting  $\nabla_{\theta} L_w(\theta_t) = \sum_{i \in \mathcal{X}^t} w_i^t \nabla_{\theta} L_T^i(\theta_t)$ , we have:

$$\begin{aligned} \mathbb{E} (t(L(\theta_t) - L(\theta^*))) &= \mathbb{E} \left( \frac{t}{\mu(t+1)} \left\| \sum_{i \in \mathcal{X}^t} w_i^t \nabla_{\theta} L_T^i(\theta_t) \right\|^2 \right) + \mathbb{E} \left( \frac{\mu t(t-1)}{4} \|\theta_t - \theta^*\|^2 \right) \\ &\quad - \mathbb{E} \left( \frac{\mu t(t+1)}{4} \|\theta_{t+1} - \theta^*\|^2 \right) - \mathbb{E} \left( t (\nabla_{\theta} L_w(\theta_t) - \nabla_{\theta} L(\theta_t))^T (\theta_t - \theta^*) \right) \end{aligned} \quad (74)$$

Since,  $\|L_T(\theta)\| \leq \sigma_T$ , we have  $\|\alpha \sum_{i \in \mathcal{X}^t} w_i^t \nabla_{\theta} L_T^i(\theta_t)\| \leq \sum_{i=1}^{|\mathcal{X}^t|} w_i^t \sigma_T$ . Assuming that the weights at every iteration are normalized such that  $\forall_{t \in [1, T]} \sum_{i=1}^{|\mathcal{X}^t|} w_i^t = 1$  and the training and validation loss gradients are normalized as well, we have  $\|\alpha \sum_{i \in \mathcal{X}^t} w_i^t \nabla_{\theta} L_T^i(\theta_t)\| \leq \sigma_T$ . Also assuming that  $\|\theta - \theta^*\| \leq D$ , we have,

$$\begin{aligned} \mathbb{E} (t(L(\theta_t) - L(\theta^*))) &= \frac{\sigma_T^2 t}{\mu(t+1)} + \frac{\mu t(t-1)}{4} \mathbb{E} \left( \|\theta_t - \theta^*\|^2 \right) \\ &\quad - \frac{\mu t(t+1)}{4} \mathbb{E} \left( \|\theta_{t+1} - \theta^*\|^2 \right) + \mathbb{E} (Dt \|\nabla_{\theta} L_w(\theta_t) - \nabla_{\theta} L(\theta_t)\|) \end{aligned} \quad (75)$$

Summing the above equation from  $t = 1, \dots, T$ , we have:

$$\begin{aligned} \sum_{t=1}^{t=T} \mathbb{E} (t(L(\theta_t) - L(\theta^*))) &= \sum_{t=1}^{t=T} \frac{\sigma_T^2 t}{\mu(t+1)} + \sum_{t=1}^{t=T} \frac{\mu t(t-1)}{4} \mathbb{E} \left( \|\theta_t - \theta^*\|^2 \right) \\ &\quad - \sum_{t=1}^{t=T} \frac{\mu t(t+1)}{4} \mathbb{E} \left( \|\theta_{t+1} - \theta^*\|^2 \right) + \sum_{t=1}^{t=T} D \mathbb{E} (t \|\nabla_{\theta} L_w(\theta_t) - \nabla_{\theta} L(\theta_t)\|) \end{aligned} \quad (76)$$

$$\begin{aligned} \sum_{t=1}^{t=T} \mathbb{E}(t(L(\theta_t) - L(\theta^*))) &\leq \sum_{t=1}^{t=T} \frac{\sigma_T^2}{\mu} + \sum_{t=1}^{t=T} \frac{\mu t(t-1)}{4} \mathbb{E}(\|\theta_t - \theta^*\|^2) \\ &\quad - \sum_{t=1}^{t=T} \frac{\mu t(t+1)}{4} \mathbb{E}(\|\theta_{t+1} - \theta^*\|^2) + \sum_{t=1}^{t=T} D \mathbb{E}(t \|\nabla_{\theta} L_w(\theta_t) - \nabla_{\theta} L(\theta_t)\|) \end{aligned} \quad (77)$$

$$\begin{aligned} \sum_{t=1}^{t=T} \mathbb{E}(t(L(\theta_t) - L(\theta^*))) &\leq \frac{\sigma_T^2 T}{\mu} + \frac{\mu}{4} (0 - T(T+1)) \mathbb{E}(\|\theta_{T+1} - \theta^*\|^2) \\ &\quad + \sum_{t=1}^{t=T} D \mathbb{E}(t \|\nabla_{\theta} L_w(\theta_t) - \nabla_{\theta} L(\theta_t)\|) \end{aligned} \quad (78)$$

Since  $\frac{\mu}{4} (0 - T(T+1)) \mathbb{E}(\|\theta_{T+1} - \theta^*\|^2) \leq 0$ , we have:

$$\sum_{t=1}^{t=T} \mathbb{E}(t(L(\theta_t) - L(\theta^*))) \leq \frac{\sigma_T^2 T}{\mu} + \sum_{t=1}^{t=T} D \mathbb{E}(t \|\nabla_{\theta} L_w(\theta_t) - \nabla_{\theta} L(\theta_t)\|) \quad (79)$$

Since,  $L(\theta_t) - L(\theta^*) \leq \min_{t=1:T} L(\theta_t) - L(\theta^*)$  and multiplying the above equation by  $\frac{2}{T(T+1)}$ , we have:

$$\frac{2}{T(T+1)} \mathbb{E} \left( \sum_{t=1}^{t=T} t (\min_{t=1:T} L(\theta_t) - L(\theta^*)) \right) \leq \frac{2}{T(T+1)} \frac{\sigma_T^2 T}{\mu} + \frac{2}{T(T+1)} \sum_{t=1}^{t=T} \mathbb{E}(Dt \|\nabla_{\theta} L_w(\theta_t) - \nabla_{\theta} L(\theta_t)\|) \quad (80)$$

This in turn implies:

$$\mathbb{E} \left( \min_{t=1:T} L(\theta_t) \right) - L(\theta^*) \leq \frac{\sigma_T^2 2}{\mu(T+1)} + \sum_{t=1}^{t=T} \frac{2D}{T(T+1)} \mathbb{E}(t \|\nabla_{\theta} L_w(\theta_t) - \nabla_{\theta} L(\theta_t)\|) \quad (81)$$

### B.3. Conditions for adaptive data selection algorithms to reduce the objective value at every iteration

We provide conditions under which the adaptive subset selection strategy reduces the objective value of  $L$  (which can either be the training loss  $L_T$  or the validation loss  $L_V$ ):

**Theorem 4** *If the Loss Function  $L$  is Lipschitz smooth with parameter  $\mathcal{L}$ , and the gradient of the training loss is bounded by  $\sigma_T$ , the adaptive data selection algorithm will reduce the objective function at every iteration, i.e.  $L(\theta_{t+1}) \leq L(\theta_t)$  as long as  $(\sum_{i \in \mathcal{X}} w_i \nabla_{\theta} L_T^i(\theta))^T \nabla_{\theta} L(\theta) \geq 0$  and the learning rate schedule satisfies  $\alpha_t \leq \min_t 2 \frac{\|\nabla_{\theta} L(\theta)\| \cos(\theta_t)}{\mathcal{L} \sigma_T}$ , where  $\theta_t$  is the angle between  $\sum_{i \in \mathcal{X}} w_i \nabla_{\theta} L_T^i(\theta)$  and  $\nabla_{\theta} L(\theta)$ .*

Before proving this result, notice that any data selection approach that attempts to minimize the error term  $\text{Err}(\mathbf{w}^t, \mathcal{X}^t, L, L_T, \theta_t) = \|\sum_{i \in \mathcal{X}^t} w_i^t \nabla_{\theta} L_T^i(\theta_t) - \nabla_{\theta} L(\theta_t)\|$ , will essentially also maximize  $(\sum_{i \in \mathcal{X}^t} w_i^t \nabla_{\theta} L_T^i(\theta))^T \nabla_{\theta} L(\theta)$ . Hence we expect the condition above to be satisfied, as long as the learning rate can be selected appropriately.

**PROOF** Suppose we have a validation set  $\mathcal{V}$  and the loss on the validation set or training set is denoted as  $L(\theta)$  depending on the usage. Suppose the subset selected by the GRAD-MATCH is denoted by  $S$  and the subset training loss is  $L_T(\theta, \mathcal{X})$ . Since validation or training loss  $L$  is lipschitz smooth, we have,

$$L(\theta_{t+1}) \leq L(\theta_t) + \frac{\mathcal{L} \|\Delta\theta\|^2}{2} + \nabla_{\theta} L(\theta_t)^T \Delta\theta, \quad \text{where, } \Delta\theta = \theta_{t+1} - \theta_t \quad (82)$$

Since, we are using SGD to optimize the subset training loss  $L_T(\theta, S)$  model parameters our update equations will be as follows:

$$\theta_{t+1} = \theta_t - \alpha \sum_{i \in \mathcal{X}} w_i \nabla_{\theta} L_T^i(\theta_t) \quad (83)$$

Plugging our updating rule (Equation 83) in (Equation 82):

$$L(\theta_{t+1}) \leq L(\theta_t) - \alpha \nabla_{\theta} L(\theta_t)^T \sum_{i \in \mathcal{X}} w_i \nabla_{\theta} L_T^i(\theta) + \frac{\mathcal{L}}{2} \left\| -\alpha \sum_{i \in \mathcal{X}} w_i \nabla_{\theta} L_T^i(\theta) \right\|^2 \quad (84)$$

Which gives,

$$L(\theta_{t+1}) - L(\theta_t) \leq -\alpha \nabla_{\theta} L(\theta_t)^T \sum_{i \in \mathcal{X}} w_i \nabla_{\theta} L_T^i(\theta) + \frac{\mathcal{L}\alpha^2}{2} \left\| \sum_{i \in \mathcal{X}} w_i \nabla_{\theta} L_T^i(\theta) \right\|^2 \quad (85)$$

From (Equation 85), note that:

$$L(\theta_{t+1}) \leq L(\theta_t) \text{ if } \alpha \left( \left( \sum_{i \in \mathcal{X}} w_i \nabla_{\theta} L_T^i(\theta) \right)^T \nabla_{\theta} L(\theta_t) - \frac{\mathcal{L}\alpha}{2} \left\| \sum_{i \in \mathcal{X}} w_i \nabla_{\theta} L_T^i(\theta) \right\|^2 \right) \geq 0 \quad (86)$$

Since we know that  $\left\| \sum_{i \in \mathcal{X}} w_i \nabla_{\theta} L_T^i(\theta) \right\|^2 \geq 0$ , we will have the necessary condition:

$$\left( \sum_{i \in \mathcal{X}} w_i \nabla_{\theta} L_T^i(\theta) \right)^T \nabla_{\theta} L(\theta_t) \geq 0$$

We can also re-write the condition in (Equation 86) as follows:

$$\left( \sum_{i \in \mathcal{X}} w_i \nabla_{\theta} L_T^i(\theta) \right)^T \nabla_{\theta} L(\theta_t) \geq \frac{\alpha \mathcal{L}}{2} \left( \sum_{i \in \mathcal{X}} w_i \nabla_{\theta} L_T^i(\theta) \right)^T \left( \sum_{i \in \mathcal{X}} w_i \nabla_{\theta} L_T^i(\theta) \right) \quad (87)$$

The Equation 87 gives the necessary condition for learning rate i.e.,

$$\alpha \leq \frac{2}{\mathcal{L}} \frac{\left( \sum_{i \in \mathcal{X}} w_i \nabla_{\theta} L_T^i(\theta) \right)^T \nabla_{\theta} L(\theta_t)}{\left( \sum_{i \in \mathcal{X}} w_i \nabla_{\theta} L_T^i(\theta) \right)^T \left( \sum_{i \in \mathcal{X}} w_i \nabla_{\theta} L_T^i(\theta) \right)} \quad (88)$$

The above Equation 88 can be written as follows:

$$\alpha \leq \frac{2}{\mathcal{L}} \frac{\|\nabla_{\theta} L(\theta_t)\| \cos(\Theta_t)}{\left\| \sum_{i \in \mathcal{X}} w_i \nabla_{\theta} L_T^i(\theta) \right\|} \quad (89)$$

where  $\cos \Theta_t = \frac{\left( \sum_{i \in \mathcal{X}} w_i \nabla_{\theta} L_T^i(\theta) \right)^T \nabla_{\theta} L(\theta_t)}{\left\| \sum_{i \in \mathcal{X}} w_i \nabla_{\theta} L_T^i(\theta) \right\| \|\nabla_{\theta} L(\theta_t)\|}$

Assuming we normalize the subset weights at every iteration i.e.,  $\forall \sum_{i \in [1, |\mathcal{X}|]} w_i^t = 1$ , we know that the gradient norm  $\left\| \sum_{i \in \mathcal{X}} w_i \nabla_{\theta} L_T^i(\theta) \right\| \leq \sigma_T$ , the condition for the learning rate can be written as follows,

$$\alpha \leq \frac{2 \|\nabla_{\theta} L(\theta_t)\| \cos(\Theta_t)}{\mathcal{L} \sigma_T} \text{ where } \cos \Theta_t = \frac{\left( \sum_{i \in \mathcal{X}} w_i \nabla_{\theta} L_T^i(\theta) \right)^T \nabla_{\theta} L(\theta_t)}{\left\| \sum_{i \in \mathcal{X}} w_i \nabla_{\theta} L_T^i(\theta) \right\| \|\nabla_{\theta} L(\theta_t)\|} \quad (90)$$

Since, the condition mentioned in Equation 90 needs to be true for all values of  $l$ , we have the condition for learning rate as follows:

$$\alpha \leq \min_t \frac{2 \|\nabla_{\theta} L(\theta_t)\| \cos(\Theta_t)}{\mathcal{L} \sigma_T} \quad (91)$$

$$\text{where } \cos \Theta_t = \frac{\left( \sum_{i \in \mathcal{X}} w_i \nabla_{\theta} L_T^i(\theta) \right)^T \nabla_{\theta} L(\theta_t)}{\left\| \sum_{i \in \mathcal{X}} w_i \nabla_{\theta} L_T^i(\theta) \right\| \|\nabla_{\theta} L(\theta_t)\|}$$

#### B.4. Proof of Theorem 2

We first restate Theorem 2

**Theorem** *If  $|\mathcal{X}| \leq k$ ,  $\max_i \|\nabla_{\theta} L_T^i(\theta_t)\|_2 < \nabla_{\max}$ , then  $F_{\lambda}(\mathcal{X})$  is  $\gamma$ -weakly submodular, with  $\gamma \geq \frac{\lambda}{\lambda + k \nabla_{\max}^2}$*

**PROOF** We first note that the minimum eigenvalue of  $F_{\lambda}(\mathcal{X})$  is atleast  $\lambda$ . Next, we note that the maximum eigenvalue of  $F_{\lambda}(\mathcal{X})$  is atmost

$$\lambda + \text{Trace}(F(\mathcal{X})) \quad (92)$$

$$= \lambda + \text{Trace} \left( \begin{bmatrix} \nabla L_T^{1\top}(\theta_t) \\ \nabla L_T^{2\top}(\theta_t) \\ \vdots \\ \nabla L_T^{k\top}(\theta_t) \end{bmatrix} \begin{bmatrix} \nabla L_T^{1\top}(\theta_t) \\ \nabla L_T^{2\top}(\theta_t) \\ \vdots \\ \nabla L_T^{k\top}(\theta_t) \end{bmatrix}^{\top} \right) \quad (93)$$

$$= \lambda + \sum_{i \in [k]} \|\nabla L_T^i(\theta_t)\|^2 \quad (94)$$

which immediately proves the theorem following (Elenberg et al., 2018).

#### B.5. Proof of Theorem 3

We start this subsection by first restating Theorem 3.

**Theorem** *If the function  $F_{\lambda}(\mathcal{X})$  is  $\gamma$ -weakly submodular,  $\mathcal{X}^*$  is the optimal subset and  $\max_i \|\nabla_{\theta} L_T^i(\theta_t)\|_2 < \nabla_{\max}$ , (both) the greedy algorithm and OMP (Algorithm 2), run with stopping criteria  $E_{\lambda}(\mathcal{X}) \leq \epsilon$  achieve sets  $\mathcal{X}$  such that  $|\mathcal{X}| \leq \frac{|\mathcal{X}^*|}{\gamma} \log\left(\frac{L_{\max}}{\epsilon}\right)$  where  $L_{\max}$  is an upper bound of  $F_{\lambda}$ .*

**PROOF** From Theorem 3, we know that  $F_{\lambda}(\mathcal{X})$  is weakly submodular with parameter  $\gamma = \frac{\lambda}{\lambda + k \nabla_{\max}^2}$ .

We first prove the result using the greedy algorithm, or in particular the submodular set cover algorithm (Wolsey, 1982). Note that an upper bound of  $F_{\lambda}$  is  $L_{\max}$ , and consider the stopping criteria of the greedy algorithm to be achieving a subset  $\mathcal{X}$  such that  $F_{\lambda}(\mathcal{X}) \geq L_{\max} - \epsilon$ . The goal is then to bound the  $|\mathcal{X}|$  of the subset  $\mathcal{X}$  achieving it compared to the optimal subset  $\mathcal{X}^*$ .

Given a set  $X_i$  which is obtained at step  $i$  of the greedy algorithm, and denote  $e_i$  to be the best gain at step  $i$ . Note that:

$$\begin{aligned} \gamma(F_{\lambda}(\mathcal{X}^* \cup X_i) - F_{\lambda}(X_i)) &\leq \sum_{j \in \mathcal{X}^*} F_{\lambda}(j|X_i) \\ &\leq |\mathcal{X}^*| F_{\lambda}(e_i|X_i) \end{aligned} \quad (95)$$

where the last inequality holds because of the greedy algorithm. This then implies that:

$$F_{\lambda}(\mathcal{X}^*) - F_{\lambda}(X_i) \leq \frac{|\mathcal{X}^*|}{\gamma} (F_{\lambda}(X_{i+1}) - F_{\lambda}(X_i)) \quad (96)$$

We modify the second term to be  $(F_{\lambda}(X_{i+1}) - F_{\lambda}(X_i)) = (F_{\lambda}(\mathcal{X}^*) - F_{\lambda}(X_i)) - (F_{\lambda}(\mathcal{X}^*) - F_{\lambda}(X_{i+1}))$  and then obtain the following recursion:

$$F_{\lambda}(\mathcal{X}^*) - F_{\lambda}(X_{i+1}) \leq \left(1 - \frac{\gamma}{|\mathcal{X}^*|}\right) (F_{\lambda}(\mathcal{X}^*) - F_{\lambda}(X_i)) \quad (97)$$

We can then recursively multiply the right hand and the left hand sides, until we reach a set  $\mathcal{X}$  such that  $F_\lambda(\mathcal{X}) \geq L_{\max} - \epsilon$  (which is the stopping criteria). We then achieve:

$$F_\lambda(\mathcal{X}^*) - F_\lambda(\mathcal{X}) \leq (1 - \gamma/|\mathcal{X}^*|)^{|\mathcal{X}|} (F_\lambda(\mathcal{X}^*) - F_\lambda(\emptyset)) \leq (1 - \gamma/|\mathcal{X}^*|)^{|\mathcal{X}|} F_\lambda(\mathcal{X}^*) \leq (1 - \gamma/|\mathcal{X}^*|)^{|\mathcal{X}|} L_{\max} \quad (98)$$

where the second-last inequality holds since  $F_\lambda(\emptyset) \geq 0$ , and the last inequality holds because  $F_\lambda(\mathcal{X}^*) \leq L_{\max}$ .

This implies that we have the following inequality:  $F_\lambda(\mathcal{X}^*) - F_\lambda(\mathcal{X}) \leq (1 - \gamma/|\mathcal{X}^*|)^{|\mathcal{X}|} L_{\max}$ . Next, notice that since  $F_\lambda(\mathcal{X}^*) \leq L_{\max}$ , which in turn implies that  $F_\lambda(\mathcal{X}^*) - F_\lambda(\mathcal{X}) \leq \epsilon$ . Hence, we can pick a  $\mathcal{X}$  such that  $(1 - \gamma/|\mathcal{X}^*|)^{|\mathcal{X}|} L_{\max} \leq \epsilon$ , which will then automatically imply that  $F_\lambda(\mathcal{X}^*) - F_\lambda(\mathcal{X}) \leq \epsilon$ . The above condition requires  $(1 - \gamma/|\mathcal{X}^*|)^{|\mathcal{X}|} \geq \epsilon$ , which in turn implies that  $|\mathcal{X}| \leq |\mathcal{X}^*|/\gamma \log L_{\max}/\epsilon$ . This shows the result for the standard greedy algorithm.

Finally, we prove it for the OMP case. In particular, from Lemma 4 and the proof of Theorem 5 in (Elenberg et al., 2018), we can obtain a recursion very similar to Equation 96, except that we have the ratio of the  $m$  and  $M$  corresponding to strong concavity and smoothness respectively. From the proof of Theorem 2, this is exactly the bound used for weak submodularity of  $F_\lambda$ , and hence the bound follows for OMP as well.

## B.6. Convergence result for GRAD-MATCH using the OMP algorithm

The following result shows the convergence bound of GRAD-MATCH using OMP as the optimization algorithm.

**Lemma 1** *Suppose the subsets  $\mathcal{X}^t$  satisfy the condition that  $E_\lambda(\mathcal{X}^t) \leq \epsilon$ , for all  $t = 1, \dots, T$ , then OMP based data selection achieves the following convergence result:*

- if  $L_T$  is Lipschitz continuous with parameter  $\sigma_T$  and  $\alpha = \frac{D}{\sigma_T \sqrt{T}}$ , then  $\min_{t=1:T} L(\theta_t) - L(\theta^*) \leq \frac{D\sigma_T}{\sqrt{T}} + D\epsilon$ ,
- if  $L_T$  is Lipschitz smooth with parameter  $\mathcal{L}_T$ , and  $L_T^i$  satisfies  $0 \leq L_T^i(\theta) \leq \beta_T, \forall i$ . Then setting  $\alpha = \frac{1}{\mathcal{L}_T}$ , we have  $\min_{t=1:T} L(\theta_t) - L(\theta^*) \leq \frac{D^2 \mathcal{L}_T + 2\beta_T}{2T} + D\epsilon$ ,
- if  $L_T$  is Lipschitz continuous (parameter  $\sigma_T$ ) and  $L$  is strongly convex with parameter  $\mu$ , then setting a learning rate  $\alpha_t = \frac{2}{\mu(1+t)}$ , achieves  $\min_{t=1:T} L(\theta_t) - L(\theta^*) \leq \frac{2\sigma_T^2}{\mu(T+1)} + D\epsilon$

**PROOF** We prove the first part and note that the other parts follow similarly. Notice that the stopping criteria of Algorithm 1 is  $E_\lambda(\mathcal{X}^t) \leq \epsilon$ . Denote  $w_t$  as the corresponding weight vector, and hence we have  $E_\lambda(\mathcal{X}^t) = E_\lambda(\mathcal{X}^t, w_t) = E(\mathcal{X}^t, w_t) + \lambda \|w_t\|^2 \leq \epsilon$ , where  $E(\mathcal{X}^t, w_t) = \text{Err}(w_t, \mathcal{X}^t, L, L_T, \theta_t)$ . Since  $\|w_t\|^2 \geq 0$ , this implies that  $\text{Err}(w_t, \mathcal{X}^t, L, L_T, \theta_t) \leq \epsilon$ , which combining with Theorem 1, immediately provides the required convergence result for OMP. Finally, note that for the third part,  $\sum_{t=1}^{t=T} \frac{2D}{T(T+1)} \epsilon = \epsilon$  and this proves all three parts.

## B.7. More details on CRAIG

### B.7.1. CONNECTIONS BETWEEN GRAD-MATCH AND CRAIG

**Lemma 2** *The following inequality connects  $\hat{E}(\mathcal{X})$  and  $E(\mathcal{X})$*

$$E(\mathcal{X}) = \min_{\mathbf{w}} \text{Err}(\mathbf{w}, \mathcal{X}, L, L_T, \theta_t) \leq \hat{E}(\mathcal{X}) \quad (99)$$

Furthermore, given the set  $\mathcal{X}^t$  obtained by optimizing  $\hat{E}$ , the weights can be computed as:  $\mathbf{w}^t = \sum_{i \in W} \mathbb{I}[j = \arg \min_{s \in \mathcal{X}^t} \|\nabla_{\theta} L_T^i(\theta_t) - \nabla_{\theta} L^s(\theta_t)\|]$ .

**PROOF** During iteration  $t \in 1, \dots, T$ , we partition  $W$  by assigning every element  $i \in W$  to an element  $\pi_t^i \in \mathcal{X}$  as follows:

$$\pi_t^i \in \arg \min_{j \in \mathcal{X}} \|\nabla_{\theta} L^i(\theta) - \nabla_{\theta} L_T^j(\theta)\| \quad (100)$$

In other words,  $\pi_t^i$  denotes the representative for a specific  $i \in W$  in set  $\mathcal{X}$ . Also recall that,  $\hat{E}(\mathcal{X})$  is defined as follows:

$$\begin{aligned} \hat{E}(\mathcal{X}) &= \sum_{i \in W} \min_{j \in \mathcal{X}} \|\nabla_{\theta} L^i(\theta_t) - \nabla_{\theta} L_T^j(\theta_t)\| \\ &= \sum_{i \in W} \|\nabla_{\theta} L^i(\theta_t) - \nabla_{\theta} L_T^{\pi_t^i}(\theta_t)\| \end{aligned} \quad (101)$$

Then, for any  $\theta_t$  we can write

$$\begin{aligned}\nabla_{\theta}L(\theta_t) &= \sum_{i \in W} (\nabla_{\theta}L_T^i(\theta_t) - \nabla_{\theta}L^{\pi^i}(\theta_t) + \nabla_{\theta}L^{\pi^i}(\theta_t)) \\ &= \sum_{i \in W} (\nabla_{\theta}L_T^i(\theta_t) - \nabla_{\theta}L^{\pi^i}(\theta_t)) + \sum_{j \in \mathcal{X}} w_j \nabla_{\theta}L^j(\theta_t)\end{aligned}$$

where  $w_j$  denotes the count of number of  $i \in W$  that were assigned to an element  $j \in \mathcal{X}$ . Subtracting the second term on the RHS, *viz.*,  $\sum_{j \in \mathcal{X}} w_j \nabla_{\theta}L^j(\theta_t)$  from the LHS and then taking the norm of the both sides, we get the following upper bound on the error of estimating the full gradient  $\text{Err}(\mathbf{w}, \mathcal{X}, L, L_T, \theta_t)$ :

$$\begin{aligned}\text{Err}(\mathbf{w}, \mathcal{X}, L, L_T, \theta_t) &= \left\| \nabla L(\theta_t) - \sum_{i \in \mathcal{X}} w_i \nabla L_T^i(\theta_t) \right\| \\ &= \left\| \sum_{i \in W} (\nabla_{\theta}L_T^i(\theta_t) - \nabla_{\theta}L^{\pi^i}(\theta_t)) \right\| \\ &\leq \sum_{i \in W} \|\nabla_{\theta}L_T^i(\theta_t) - \nabla_{\theta}L^{\pi^i}(\theta_t)\|,\end{aligned}$$

where the inequality follows from the triangle inequality.

With  $\pi_t^i \in \arg \min_{j \in \mathcal{X}} \|\nabla_{\theta}L^i(\theta) - \nabla_{\theta}L_T^j(\theta)\|$ , the upper bound exactly equals the function  $\hat{E}(\mathcal{X})$  defined below:

$$\begin{aligned}\hat{E}(\mathcal{X}) &= \sum_{i \in W} \min_{j \in \mathcal{X}} \|\nabla_{\theta}L^i(\theta_t) - \nabla_{\theta}L_T^j(\theta_t)\| \\ &= \sum_{i \in W} \|\nabla_{\theta}L^i(\theta_t) - \nabla_{\theta}L_T^{\pi_t^i}(\theta_t)\|\end{aligned}\tag{102}$$

Hence it follows that  $\hat{E}(\mathcal{X})$  is an upper bound of  $E(\mathcal{X})$ .

### B.7.2. MAXIMIZATION VERSION OF CRAIG

We can similarly formulate the maximization version of this problem. Define:

$$\begin{aligned}\hat{F}(\mathcal{X}) &= \sum_{i \in W} L_{\max} - \min_{j \in \mathcal{X}} \|\nabla_{\theta}L^i(\theta_t) - \nabla_{\theta}L_T^j(\theta_t)\| \\ &= \sum_{i \in W} \max_{j \in \mathcal{X}} (L_{\max} - \|\nabla_{\theta}L^i(\theta_t) - \nabla_{\theta}L_T^j(\theta_t)\|)\end{aligned}$$

Note that this function is exactly the Facility Location function considered in CRAIG (Mirzasoleiman et al., 2020a), and  $\hat{F}(\mathcal{X})$  is a lower bound of  $F(\mathcal{X})$ . Maximizing the above expression under the constraint  $|\mathcal{X}| \leq k$  is an instance of cardinality constraint submodular maximization, and a simple greedy algorithm achieves a  $1 - 1/e$  approximation (Nemhauser et al., 1978).

Next, we look at the dual problem, *i.e.*, finding the minimum set size such that the error is bounded. Through the following minimization problem we obtain the smallest weighted subset  $\mathcal{X}$  that approximates the full gradient by an error of at most  $\epsilon$  for the current parameters  $\theta_t$ :

$$\mathcal{X}^t = \min_{\mathcal{X}} |\mathcal{X}|, \text{ so that, } \hat{E}(\mathcal{X}) \leq \epsilon.\tag{103}$$

We can rewrite Equation 103 as an instance of submodular set cover:

$$\mathcal{X}^t = \min_{\mathcal{X}} |\mathcal{X}|, \text{ s.t. } \hat{F}(\mathcal{X}) \geq |\mathcal{W}|L_{\max} - \epsilon.\tag{104}$$

This is an instance of submodular set cover, which can also be approximated up to a log-factor (Wolsey, 1982; Mirzasoleiman et al., 2015). In particular, denote  $Q = \hat{F}(\mathcal{X}^*)$  as the optimal solution. Then the greedy algorithm is guaranteed to obtain a set  $\hat{\mathcal{X}}$  such that  $\hat{F}(\hat{\mathcal{X}}) \geq |\mathcal{W}|L_{\max} - \epsilon$  and  $|\hat{\mathcal{X}}| \leq |\mathcal{X}^*| \log(Q/\epsilon)$ . Next, note that obtaining a set  $\hat{\mathcal{X}}$  such that  $\hat{F}(\hat{\mathcal{X}}) \geq |\mathcal{W}|L_{\max} - \epsilon$  is equivalent to  $\hat{E}(\hat{\mathcal{X}}) \leq \epsilon$ . Using this fact, and the convergence result of Theorem 1, we can derive convergence bounds for CRAIG. In particular, assume that using the submodular set cover, we achieve sets  $\mathcal{X}^t$  such that  $\hat{E}(\mathcal{X}^t) \leq \epsilon$ . The following corollary provides a convergence result for the facility location based upper bound approach.

B.7.3. CONVERGENCE BOUND FOR CRAIG

Next, we state and prove a convergence bound for CRAIG.

**Lemma 3** Suppose the subsets  $\mathcal{X}^t$  satisfy  $\hat{E}(\mathcal{X}^t) \leq \epsilon, \forall t = 1, \dots, T$ , then using the facility location upper bound for data selection achieves the following convergence result:

- if  $L_T$  is Lipschitz continuous with parameter  $\sigma_T$  and  $\alpha = \frac{D}{\sigma_T \sqrt{T}}$ , then  $\min_{t=1:T} L(\theta_t) - L(\theta^*) \leq \frac{D\sigma_T}{\sqrt{T}} + D\epsilon$ ,
- if  $L_T$  is Lipschitz smooth with parameter  $\mathcal{L}_T$ , and  $L_T^i$  satisfies  $0 \leq L_T^i(\theta) \leq \beta_T, \forall i$ . Then setting  $\alpha = \frac{1}{\mathcal{L}_T}$ , we have  $\min_{t=1:T} L(\theta_t) - L(\theta^*) \leq \frac{D^2 \mathcal{L}_T + 2\beta_T}{2T} + D\epsilon$ ,
- if  $L_T$  is Lipschitz continuous (parameter  $\sigma_T$ ) and  $L$  is strongly convex with parameter  $\mu$ , then setting a learning rate  $\alpha_t = \frac{2}{\mu(1+t)}$ , achieves  $\min_{t=1:T} L(\theta_t) - L(\theta^*) \leq \frac{2\sigma_T^2}{\mu(T+1)} + D\epsilon$

PROOF We prove the first part and note that the other parts follow similarly. Notice that the CRAIG algorithm tries to minimize the term  $\hat{E}(\mathcal{X}^t) = \sum_{i \in W} \min_{j \in \mathcal{X}^t} \|\nabla_{\theta} L^i(\theta_t) - \nabla_{\theta} L_T^j(\theta_t)\|$  which is an upper bound of  $E(\mathcal{X}^t) = \min_{\mathbf{w}} \text{Err}(\mathbf{w}^t, \mathcal{X}^t, L, L_T, \theta_t)$  from Lemma B.7 (i.e.,  $\text{Err}(\mathbf{w}^t, \mathcal{X}^t, L, L_T, \theta_t) \leq \hat{E}(\mathcal{X}^t)$ ). From the assumption that  $\hat{E}(\mathcal{X}^t) \leq \epsilon$ , we have  $\text{Err}(\mathbf{w}^t, \mathcal{X}^t, L, L_T, \theta_t) \leq \epsilon$ , which combining with Theorem 1, immediately proves the required convergence result for CRAIG. Finally, note that for the third part,  $\sum_{t=1}^{t=T} \frac{2D\epsilon}{T(T+1)} = \epsilon$  and this proves all three parts.

C. More Experimental Details and Additional Results

C.1. Datasets Description

We used various standard datasets, namely, MNIST, CIFAR10, SVHN, CIFAR100, ImageNet, to demonstrate the effectiveness and stability of GRAD-MATCH.

| Name     | No. of classes | No. samples for training | No. samples for validation | No. samples for testing | No. of features |
|----------|----------------|--------------------------|----------------------------|-------------------------|-----------------|
| CIFAR10  | 10             | 50,000                   | -                          | 10,000                  | 32x32x3         |
| MNIST    | 10             | 60,000                   | -                          | 10,000                  | 28x28           |
| SVHN     | 10             | 73,257                   | -                          | 26,032                  | 32x32x3         |
| CIFAR100 | 100            | 50,000                   | -                          | 10,000                  | 32x32x3         |
| ImageNet | 1000           | 1,281,167                | 50,000                     | 100,000                 | 224x224x3       |

Table 2. Description of the datasets

Table 2 gives a brief description about the datasets. Here not all datasets have an explicit validation and test set. For such datasets, 10% and 20% samples from the training set are used as validation and test set, respectively. The feature count given for the ImageNet dataset is after applying the `RandomResizedCrop` transformation function from PyTorch (Paszke et al., 2017).

C.2. Experimental Settings

We ran experiments using an SGD optimizer with an initial learning rate of 0.01, the momentum of 0.9, and a weight decay of  $5e-4$ . We decay the learning rate using cosine annealing (Loshchilov & Hutter, 2017) for each epoch. For MNIST, we use the LeNet model (LeCun et al., 1989) and train the model for 200 epochs. For all other datasets, we use ResNet18 model (He et al., 2016) and train the model for 300 epochs (except for ImageNet, where we train the model for 350 epochs).

To demonstrate our method’s effectiveness in a robust learning setting, we artificially generate class-imbalance for the above datasets by removing almost 90% of the instances from 30% of total classes available. We ran all experiments on a single V100 GPU, except for ImageNet, where we used an RTX 2080 GPU. However, for a given dataset, all experiments were run on the same GPU so that the speedup and energy comparison across techniques is fair.

C.3. Other specific settings

Here we discuss various parameters’ required by Algorithm 2, their significance, and the values used in the experiments.



|                  |          | Data Selection Results                                                                                            |                    |                                     |                                                                                                                   |              |                             |               |               |             |              |        |       |        |
|------------------|----------|-------------------------------------------------------------------------------------------------------------------|--------------------|-------------------------------------|-------------------------------------------------------------------------------------------------------------------|--------------|-----------------------------|---------------|---------------|-------------|--------------|--------|-------|--------|
| Dataset          | Model    | Budget(%)                                                                                                         | Selection Strategy | Top-1 Test accuracy of the Model(%) |                                                                                                                   |              | Model Training time(in hrs) |               |               |             |              |        |       |        |
|                  |          |                                                                                                                   |                    | 5%                                  | 10%                                                                                                               | 20%          | 30%                         | 5%            | 10%           | 20%         | 30%          |        |       |        |
| CIFAR10          | ResNet18 | FULL (skyline for test accuracy)<br>RANDOM (skyline for training time)<br>RANDOM-WARM (skyline for training time) | GLISTER            | 95.09                               | 95.09                                                                                                             | 95.09        | 95.09                       | 4.34          | 4.34          | 4.34        | 4.34         |        |       |        |
|                  |          |                                                                                                                   | GLISTER-WARM       | 86.57                               | 91.56                                                                                                             | 92.98        | 94.09                       | 0.42          | 0.88          | 1.08        | 1.40         |        |       |        |
|                  |          |                                                                                                                   | CRAIG              | 82.74                               | 87.49                                                                                                             | 90.79        | 92.53                       | 0.81          | 1.08          | 1.45        | 2.399        |        |       |        |
|                  |          |                                                                                                                   | CRAIG-WARM         | 84.48                               | 89.28                                                                                                             | 92.01        | 92.82                       | 0.6636        | 0.91          | 1.31        | 2.20         |        |       |        |
|                  |          |                                                                                                                   | CRAIGPB            | 83.56                               | 88.77                                                                                                             | 92.24        | 93.58                       | 0.4466        | 0.70          | 1.13        | 2.07         |        |       |        |
|                  |          |                                                                                                                   | CRAIGPB-WARM       | 86.28                               | 90.07                                                                                                             | 93.06        | 93.8                        | 0.4143        | 0.647         | 1.07        | 2.06         |        |       |        |
|                  |          |                                                                                                                   | GRADMATCH          | 86.7                                | 90.9                                                                                                              | 91.67        | 91.89                       | 0.40          | 0.84          | 1.42        | 1.52         |        |       |        |
|                  |          |                                                                                                                   | GRADMATCH-WARM     | <b>87.2</b>                         | 92.15                                                                                                             | 92.11        | 92.01                       | 0.38          | 0.73          | 1.24        | 1.41         |        |       |        |
|                  |          |                                                                                                                   | GRADMATCHPB        | 85.4                                | 90.01                                                                                                             | 93.34        | 93.75                       | 0.36          | 0.69          | 1.09        | 1.38         |        |       |        |
|                  |          |                                                                                                                   | GRADMATCHPB-WARM   | 86.37                               | <b>92.26</b>                                                                                                      | <b>93.59</b> | <b>94.17</b>                | <b>0.32</b>   | <b>0.62</b>   | <b>1.05</b> | <b>1.36</b>  |        |       |        |
|                  |          |                                                                                                                   | CIFAR100           | ResNet18                            | FULL (skyline for test accuracy)<br>RANDOM (skyline for training time)<br>RANDOM-WARM (skyline for training time) | GLISTER      | 75.37                       | 75.37         | 75.37         | 75.37       | 4.871        | 4.871  | 4.871 | 4.871  |
|                  |          |                                                                                                                   |                    |                                     |                                                                                                                   | GLISTER-WARM | 19.02                       | 31.56         | 49.6          | 58.56       | 0.2475       | 0.4699 | 0.92  | 1.453  |
|                  |          |                                                                                                                   |                    |                                     |                                                                                                                   | CRAIG        | 58.2                        | 65.95         | 70.3          | 72.4        | 0.242        | 0.468  | 0.921 | 1.43   |
|                  |          |                                                                                                                   |                    |                                     |                                                                                                                   | CRAIG-WARM   | 29.94                       | 44.03         | 61.56         | 70.49       | 0.3536       | 0.6456 | 1.11  | 1.5255 |
| CRAIGPB          | 57.17    | 64.95                                                                                                             |                    |                                     |                                                                                                                   | 62.14        | 72.43                       | 0.3185        | 0.6059        | 1.06        | <b>1.452</b> |        |       |        |
| CRAIGPB-WARM     | 36.61    | 55.19                                                                                                             |                    |                                     |                                                                                                                   | 66.24        | 70.01                       | 1.354         | 1.785         | 1.91        | 2.654        |        |       |        |
| GRADMATCH        | 57.44    | 67.3                                                                                                              |                    |                                     |                                                                                                                   | 69.76        | 72.77                       | 1.09          | 1.48          | 1.81        | 2.4112       |        |       |        |
| GRADMATCH-WARM   | 38.95    | 54.59                                                                                                             |                    |                                     |                                                                                                                   | 67.12        | 70.61                       | 0.4489        | 0.6564        | 1.15        | 1.540        |        |       |        |
| GRADMATCHPB      | 57.66    | 67.8                                                                                                              |                    |                                     |                                                                                                                   | 70.84        | 73.79                       | 0.394         | 0.6030        | 1.10        | 1.5567       |        |       |        |
| GRADMATCHPB-WARM | 41.01    | 59.88                                                                                                             |                    |                                     |                                                                                                                   | 68.25        | 71.5                        | 0.5143        | 0.8114        | 1.40        | 2.002        |        |       |        |
| SVHN             | ResNet18 | FULL (skyline for test accuracy)<br>RANDOM (skyline for training time)<br>RANDOM-WARM (skyline for training time) |                    |                                     |                                                                                                                   | GLISTER      | 96.49                       | 96.49         | 96.49         | 96.49       | 6.436        | 6.436  | 6.436 | 6.436  |
|                  |          |                                                                                                                   |                    |                                     |                                                                                                                   | GLISTER-WARM | 89.33                       | 93.477        | 94.7          | 95.31       | 0.342        | 0.6383 | 1.26  | 1.90   |
|                  |          |                                                                                                                   |                    |                                     |                                                                                                                   | CRAIG        | 94.1                        | 94.4          | 95.87         | 96.01       | 0.34         | 0.637  | 1.26  | 1.90   |
|                  |          |                                                                                                                   |                    |                                     |                                                                                                                   | CRAIG-WARM   | 94.78                       | 95.37         | 95.5          | 95.82       | 0.5733       | 0.9141 | 1.62  | 2.514  |
|                  |          |                                                                                                                   | CRAIGPB            | <b>94.99</b>                        | 95.50                                                                                                             | 95.8         | 95.69                       | 0.5098        | 0.8522        | 1.58        | <b>2.34</b>  |        |       |        |
|                  |          |                                                                                                                   | CRAIGPB-WARM       | 94.003                              | 94.86                                                                                                             | 95.83        | 96.223                      | 1.3886        | 1.7566        | 2.39        | 3.177        |        |       |        |
| SVHN             | ResNet18 | FULL (skyline for test accuracy)<br>RANDOM (skyline for training time)<br>RANDOM-WARM (skyline for training time) | GLISTER            | 93.81                               | 95.27                                                                                                             | 96.0         | 96.15                       | 1.113         | 1.4599        | 2.15        | 2.6617       |        |       |        |
|                  |          |                                                                                                                   | GLISTER-WARM       | 94.26                               | 95.367                                                                                                            | 95.92        | 96.043                      | 0.5934        | 1.009         | 1.65        | 2.413        |        |       |        |
|                  |          |                                                                                                                   | CRAIG              | 94.339                              | <b>95.724</b>                                                                                                     | 96.06        | 96.385                      | 0.5279        | 0.93406       | 1.58        | 2.332        |        |       |        |
|                  |          |                                                                                                                   | CRAIG-WARM         | 94.01                               | 94.45                                                                                                             | 95.4         | 95.73                       | 0.8153        | 1.1541        | 1.64        | 2.981        |        |       |        |
|                  |          |                                                                                                                   | CRAIGPB            | 94.94                               | 95.13                                                                                                             | 96.03        | 95.79                       | 0.695         | 0.9313        | 1.59        | 2.417        |        |       |        |
|                  |          |                                                                                                                   | CRAIGPB-WARM       | 94.37                               | 95.36                                                                                                             | 96.12        | 96.24                       | 0.5134        | 0.8438        | 1.6         | 2.52         |        |       |        |
| SVHN             | ResNet18 | FULL (skyline for test accuracy)<br>RANDOM (skyline for training time)<br>RANDOM-WARM (skyline for training time) | GLISTER            | 94.77                               | 95.64                                                                                                             | <b>96.21</b> | <b>96.425</b>               | <b>0.4618</b> | <b>0.7889</b> | <b>1.51</b> | <b>2.398</b> |        |       |        |
|                  |          |                                                                                                                   | GLISTER-WARM       | 96.49                               | 96.49                                                                                                             | 96.49        | 96.49                       | 6.436         | 6.436         | 6.436       | 6.436        |        |       |        |
|                  |          |                                                                                                                   | CRAIG              | 89.33                               | 93.477                                                                                                            | 94.7         | 95.31                       | 0.342         | 0.6383        | 1.26        | 1.90         |        |       |        |
|                  |          |                                                                                                                   | CRAIG-WARM         | 94.1                                | 94.4                                                                                                              | 95.87        | 96.01                       | 0.34          | 0.637         | 1.26        | 1.90         |        |       |        |
|                  |          |                                                                                                                   | CRAIGPB            | 94.78                               | 95.37                                                                                                             | 95.5         | 95.82                       | 0.5733        | 0.9141        | 1.62        | 2.514        |        |       |        |
|                  |          |                                                                                                                   | CRAIGPB-WARM       | <b>94.99</b>                        | 95.50                                                                                                             | 95.8         | 95.69                       | 0.5098        | 0.8522        | 1.58        | <b>2.34</b>  |        |       |        |

Table 3. Data Selection Results for CIFAR10, CIFAR100 and SVHN datasets

| MNIST Data Selection Results |             |              |                                         |                                     |              |             |                             |             |        |        |        |
|------------------------------|-------------|--------------|-----------------------------------------|-------------------------------------|--------------|-------------|-----------------------------|-------------|--------|--------|--------|
| Dataset                      | Model       | Budget(%)    | Selection Strategy                      | Top-1 Test accuracy of the Model(%) |              |             | Model Training time(in hrs) |             |        |        |        |
|                              |             |              |                                         | 1%                                  | 3%           | 5%          | 10%                         | 1%          | 3%     | 5%     | 10%    |
| MNIST                        | LeNet       | 99.35        | FULL (skyline for test accuracy)        | 99.35                               | 99.35        | 99.35       | 99.35                       | 0.82        | 0.82   | 0.82   | 0.82   |
|                              |             |              | RANDOM (skyline for training time)      | 94.55                               | 97.14        | 97.7        | 98.38                       | 0.0084      | 0.03   | 0.04   | 0.084  |
|                              |             |              | RANDOM-WARM (skyline for training time) | 98.8                                | 99.1         | 99.1        | 99.13                       | 0.0085      | 0.03   | 0.04   | 0.085  |
|                              |             |              | GLISTER                                 | 93.11                               | 98.062       | 99.02       | 99.134                      | 0.045       | 0.0625 | 0.082  | 0.132  |
|                              |             |              | GLISTER-WARM                            | 97.63                               | 98.9         | 99.1        | 99.15                       | 0.04        | 0.058  | 0.078  | 0.127  |
|                              |             |              | CRAIG                                   | 96.18                               | 96.93        | 97.81       | 98.7                        | 0.3758      | 0.4173 | 0.434  | 0.497  |
|                              |             |              | CRAIG-WARM                              | 98.48                               | 98.96        | 99.12       | 99.14                       | 0.2239      | 0.258  | 0.2582 | 0.3416 |
|                              |             |              | CRAIGPB                                 | 97.72                               | 98.47        | 98.79       | 99.05                       | 0.08352     | 0.106  | 0.1175 | 0.185  |
|                              |             |              | CRAIGPB-WARM                            | 98.47                               | 99.08        | 99.01       | 99.16                       | 0.055       | 0.077  | 0.0902 | 0.1523 |
|                              |             |              | GRADMATCH                               | 98.954                              | 99.174       | 99.214      | 99.24                       | 0.05        | 0.0607 | 0.097  | 0.138  |
| GRADMATCH-WARM               | 98.86       | 99.22        | 99.28                                   | 99.29                               | 0.046        | 0.057       | 0.089                       | 0.132       |        |        |        |
| GRADMATCHPB                  | 98.7        | 99.1         | 99.25                                   | 99.27                               | 0.04         | 0.051       | 0.07                        | 0.11        |        |        |        |
| GRADMATCHPB-WARM             | <b>99.0</b> | <b>99.23</b> | <b>99.3</b>                             | <b>99.31</b>                        | <b>0.038</b> | <b>0.05</b> | <b>0.065</b>                | <b>0.10</b> |        |        |        |

Table 4. Data Selection Results for MNIST dataset

| ImageNet Data Selection Results |              |              |                                    |                        |               |              |                             |         |        |
|---------------------------------|--------------|--------------|------------------------------------|------------------------|---------------|--------------|-----------------------------|---------|--------|
| Dataset                         | Model        | Budget(%)    | Selection Strategy                 | Top-1 Test accuracy(%) |               |              | Model Training time(in hrs) |         |        |
|                                 |              |              |                                    | 5%                     | 10%           | 30%          | 5%                          | 10%     | 30%    |
| ImageNet                        | ResNet18     | 99.0         | FULL (skyline for test accuracy)   | 70.36                  | 70.36         | 70.36        | 276.28                      | 276.28  | 276.28 |
|                                 |              |              | RANDOM (skyline for training time) | 21.124                 | 33.512        | 55.12        | 14.12                       | 28.712  | 81.7   |
|                                 |              |              | CRAIGPB                            | 44.28                  | 55.36         | 63.52        | 22.24                       | 38.9512 | 96.624 |
|                                 |              |              | GRADMATCH                          | 47.24                  | 56.81         | 66.21        | 18.24                       | 35.7042 | 90.25  |
|                                 |              |              | GRADMATCH-WARM                     | 55.86                  | 58.21         | 68.241       | 16.48                       | 33.024  | 88.248 |
| GRADMATCHHPB                    | 45.15        | 59.04        | 68.12                              | 16.12                  | 30.472        | 86.32        |                             |         |        |
| GRADMATCHPB-WARM                | <b>56.61</b> | <b>61.16</b> | <b>69.06</b>                       | <b>15.28</b>           | <b>29.964</b> | <b>86.05</b> |                             |         |        |

Table 5. Data Selection Results for ImageNet dataset

- $k$  determines the subset size with which we train the model.
- $\epsilon$  determines the extent of gradient approximation we want. We use a value of  $1e-10$  in our experiments.
- $\lambda$  determines how much regularization we want. We set  $\lambda = 0.5$ .

#### C.4. Data Selection Results:

This section shows the results of training neural networks on subsets selected by different data selection strategies for various datasets. Table 3 shows the test accuracy and the training time of the ResNet18 model on CIFAR10, CIFAR100, and SVHN datasets for 300 epochs. Table 4 shows the test accuracy and the training time of the LeNet model on the MNIST dataset for 200 epochs. Table 5 shows the test accuracy and the training time of the ResNet18 model on the ImageNet dataset for 350 epochs. From the results, it is evident that GRAD-MATCHPB-WARM not only outperforms other baselines in terms of accuracy but is also more efficient in model training times. Furthermore, GLISTER and CRAIG could not be run on ImageNet due to large memory requirements and running time. GRAD-MATCH, GRAD-MATCHPB, and CRAIGPB were the only variants which could scale to ImageNet. Furthermore, GLISTER and CRAIG also perform poorly on CIFAR-100. Overall, we observe that GRAD-MATCH and its variants consistently outperform all baselines by achieving higher test accuracy and lower training times.

**Energy Consumption Results:** Table 6 shows the energy consumption (in KWH) for different subset sizes of CIFAR10, CIFAR100 datasets. The results show that GRAD-MATCHPB-WARM strategy is the most efficient in energy consumption out of all other selection strategies. Similarly, we could also observe that the PerBatch variants, i.e., CRAIGPB, GRAD-MATCHPB have better energy efficiency compared to GRAD-MATCH and CRAIG.

|                                              |               | Energy Consumption Results                   |                                                   |               |               |               |
|----------------------------------------------|---------------|----------------------------------------------|---------------------------------------------------|---------------|---------------|---------------|
|                                              |               | Budget(%)                                    | Energy consumption for training the Model(in KWH) |               |               |               |
| Dataset                                      | Model         | Selection Strategy                           | 5%                                                | 10%           | 20%           | 30%           |
| CIFAR10                                      | ResNet18      | FULL                                         | 0.5032                                            | 0.5032        | 0.5032        | 0.5032        |
|                                              |               | RANDOM (Skyline for Energy Consumption)      | 0.0592                                            | 0.0911        | 0.1281        | 0.18          |
|                                              |               | RANDOM-WARM (Skyline for Energy Consumption) | 0.0581                                            | 0.0901        | 0.128         | 0.176         |
|                                              |               | GLISTER                                      | 0.0693                                            | 0.1012        | 0.1392        | 0.1982        |
|                                              |               | GLISTER-WARM                                 | 0.0672                                            | 0.0990        | 0.1360        | 0.1932        |
|                                              |               | CRAIG                                        | 0.0832                                            | 0.1195        | 0.1499        | 0.2063        |
|                                              |               | CRAIG-WARM                                   | 0.0770                                            | 0.1118        | 0.1438        | 0.2043        |
|                                              |               | CRAIGPB                                      | 0.0709                                            | 0.1031        | 0.1384        | 0.2005        |
|                                              |               | CRAIGPB-WARM                                 | 0.0682                                            | 0.1023        | 0.1355        | 0.2016        |
|                                              |               | GRAD-MATCH                                   | 0.0734                                            | 0.1173        | 0.1501        | 0.2026        |
|                                              |               | GRAD-MATCH-WARM                              | 0.0703                                            | 0.1083        | 0.1429        | 0.2004        |
|                                              |               | GRAD-MATCHPB                                 | 0.0670                                            | 0.1006        | 0.1378        | 0.1927        |
|                                              |               | GRAD-MATCHPB-WARM                            | <b>0.0649</b>                                     | <b>0.0978</b> | <b>0.1354</b> | <b>0.1912</b> |
|                                              |               | CIFAR100                                     | ResNet18                                          | FULL          | 0.5051        | 0.5051        |
| RANDOM (Skyline for Energy Consumption)      | 0.0582        |                                              |                                                   | 0.0851        | 0.1116        | 0.1910        |
| RANDOM-WARM (Skyline for Energy Consumption) | 0.0581        |                                              |                                                   | 0.0850        | 0.1115        | 0.1910        |
| GLISTER                                      | 0.0674        |                                              |                                                   | 0.0991        | 0.1454        | 0.2084        |
| GLISTER-WARM                                 | 0.0650        |                                              |                                                   | 0.0940        | 0.1444        | 0.2018        |
| CRAIG                                        | 0.1146        |                                              |                                                   | 0.1294        | 0.1795        | 0.2378        |
| CRAIG-WARM                                   | 0.0895        |                                              |                                                   | 0.1209        | 0.1651        | 0.2306        |
| CRAIGPB                                      | 0.0747        |                                              |                                                   | 0.0946        | 0.1443        | 0.2053        |
| CRAIGPB-WARM                                 | 0.0710        |                                              |                                                   | 0.0916        | 0.1447        | 0.2039        |
| GRAD-MATCH                                   | 0.0721        |                                              |                                                   | 0.1129        | 0.1577        | 0.2297        |
| GRAD-MATCH-WARM                              | 0.0688        |                                              |                                                   | 0.0980        | 0.1531        | 0.2125        |
| GRAD-MATCHPB                                 | 0.0672        |                                              |                                                   | 0.0978        | 0.1477        | 0.2100        |
| GRAD-MATCHPB-WARM                            | <b>0.0649</b> |                                              |                                                   | <b>0.0928</b> | <b>0.1411</b> | <b>0.2001</b> |

Table 6. Energy consumptions results for training a ResNet18 model on CIFAR10, CIFAR100 datasets for 300 epochs

#### C.5. Standard deviation and statistical significance results:

Table 7 shows the standard deviation results over five training runs on CIFAR10, CIFAR100, and MNIST datasets. The results show that the GRAD-MATCHPB-WARM has the least standard deviation compared to other subset selection strategies. Note that the standard deviation of subset selection strategies is large for smaller subsets across different selection strategies. Furthermore, GLISTER has higher standard deviation values than random for smaller subsets, which partly explains the

| Standard Deviation Results |          |                    |                                             |        |        |        |
|----------------------------|----------|--------------------|---------------------------------------------|--------|--------|--------|
| Budget(%)                  |          |                    | Standard deviation of the Model(for 5 runs) |        |        |        |
| Dataset                    | Model    | Selection Strategy | 5%                                          | 10%    | 20%    | 30%    |
| CIFAR10                    | ResNet18 | FULL               | 0.032                                       | 0.032  | 0.032  | 0.032  |
|                            |          | RANDOM             | 0.483                                       | 0.518  | 0.524  | 0.538  |
|                            |          | RANDOM-WARM        | 0.461                                       | 0.348  | 0.24   | 0.1538 |
|                            |          | GLISTER            | 0.453                                       | 0.107  | 0.046  | 0.345  |
|                            |          | GLISTER-WARM       | 0.325                                       | 0.086  | 0.135  | 0.129  |
|                            |          | CRAIG              | 0.289                                       | 0.2657 | 0.1894 | 0.1647 |
|                            |          | CRAIG-WARM         | 0.123                                       | 0.1185 | 0.1058 | 0.1051 |
|                            |          | CRAIGPB            | 0.152                                       | 0.1021 | 0.086  | 0.064  |
|                            |          | CRAIGPB-WARM       | 0.0681                                      | 0.061  | 0.0623 | 0.0676 |
|                            |          | GRAD-MATCH         | 0.192                                       | 0.123  | 0.112  | 0.1023 |
|                            |          | GRAD-MATCH-WARM    | 0.1013                                      | 0.1032 | 0.091  | 0.1034 |
|                            |          | GRAD-MATCHPB       | 0.0581                                      | 0.0571 | 0.0542 | 0.0584 |
|                            |          | GRAD-MATCHPB-WARM  | 0.0542                                      | 0.0512 | 0.0671 | 0.0581 |
|                            |          | CIFAR100           | ResNet18                                    | FULL   | 0.051  | 0.051  |
| RANDOM                     | 0.659    |                    |                                             | 0.584  | 0.671  | 0.635  |
| RANDOM-WARM                | 0.359    |                    |                                             | 0.242  | 0.187  | 0.175  |
| GLISTER                    | 0.463    |                    |                                             | 0.15   | 0.061  | 0.541  |
| GLISTER-WARM               | 0.375    |                    |                                             | 0.083  | 0.121  | 0.294  |
| CRAIG                      | 0.3214   |                    |                                             | 0.214  | 0.195  | 0.187  |
| CRAIG-WARM                 | 0.18     |                    |                                             | 0.132  | 0.125  | 0.115  |
| CRAIGPB                    | 0.12     |                    |                                             | 0.134  | 0.123  | 0.115  |
| CRAIGPB-WARM               | 0.1176   |                    |                                             | 0.1152 | 0.1128 | 0.111  |
| GRAD-MATCH                 | 0.285    |                    |                                             | 0.176  | 0.165  | 0.156  |
| GRAD-MATCH-WARM            | 0.140    |                    |                                             | 0.134  | 0.142  | 0.156  |
| GRAD-MATCHPB               | 0.104    |                    |                                             | 0.111  | 0.105  | 0.097  |
| GRAD-MATCHPB-WARM          | 0.093    |                    |                                             | 0.101  | 0.100  | 0.098  |
| MNIST                      | LeNet    |                    |                                             | FULL   | 0.012  | 0.012  |
|                            |          | RANDOM             | 0.215                                       | 0.265  | 0.224  | 0.213  |
|                            |          | RANDOM-WARM        | 0.15                                        | 0.121  | 0.110  | 0.103  |
|                            |          | GLISTER            | 0.256                                       | 0.218  | 0.145  | 0.128  |
|                            |          | GLISTER-WARM       | 0.128                                       | 0.134  | 0.119  | 0.124  |
|                            |          | CRAIG              | 0.186                                       | 0.178  | 0.162  | 0.125  |
|                            |          | CRAIG-WARM         | 0.0213                                      | 0.0223 | 0.0196 | 0.0198 |
|                            |          | CRAIGPB            | 0.021                                       | 0.0209 | 0.0216 | 0.0204 |
|                            |          | CRAIGPB-WARM       | 0.023                                       | 0.0192 | 0.0212 | 0.0184 |
|                            |          | GRAD-MATCH         | 0.156                                       | 0.128  | 0.135  | 0.12   |
|                            |          | GRAD-MATCH-WARM    | 0.087                                       | 0.084  | 0.0896 | 0.0815 |
|                            |          | GRAD-MATCHPB       | 0.0181                                      | 0.0163 | 0.0147 | 0.0129 |
|                            |          | GRAD-MATCHPB-WARM  | 0.0098                                      | 0.012  | 0.0096 | 0.0092 |

Table 7. Standard deviation results for CIFAR10, CIFAR100 and MNIST datasets for 5 runs

fact that it does not work as well for very small subsets (e.g. 1% - 5%). We could also observe that the warm start variants of subset selection strategies have lower variance than non-warm-start ones from the standard deviation numbers, partly because of the better initialization they offer. Finally, the PerBatch variants GRAD-MATCHPB and CRAIGPB have lower standard deviation compared to GRAD-MATCH and CRAIG which proves the effectiveness of Per-Batch approximation.

In Table 8, we show the p-values of one-tailed Wilcoxon signed-rank test (Wilcoxon, 1992) performed on every single possible pair of data selection strategies to determine whether there is a significant statistical difference between the strategies in each pair, across all datasets. Our null hypothesis is that there is no difference between the data selection strategies pair. From the results, it is evident that GRAD-MATCHPB-WARM variant significantly outperforms other baselines at  $p < 0.01$ .

### C.6. Other Results:

**Gradient Errors:** Table 9 shows the average gradient error obtained by various subset selection algorithms for the MNIST dataset. We observe that the gradient error of GRAD-MATCHPB is the smallest, followed closely by CRAIGPB. From the results, it is also evident that the PerBatch variants i.e., GRAD-MATCHPB and CRAIGPB achieves lower gradient error compared to GRAD-MATCH and CRAIG. Also note that GRAD-MATCH has a lower gradient error compared to CRAIG and GRAD-MATCH-PB has a lower gradient error compared to CRAIG-PB. This is expected since GRAD-MATCH directly

**GRAD-MATCH: Gradient Matching based Data Subset Selection for Efficient Training**

|                   |        |         |          |        |        |        |        |        |        |        |  |  |  |  |  |  |  |  |  |  |
|-------------------|--------|---------|----------|--------|--------|--------|--------|--------|--------|--------|--|--|--|--|--|--|--|--|--|--|
| RANDOM            |        |         |          |        |        |        |        |        |        |        |  |  |  |  |  |  |  |  |  |  |
| GLISTER           | 0.0006 |         |          |        |        |        |        |        |        |        |  |  |  |  |  |  |  |  |  |  |
| GLISTER-WARM      | 0.0002 | 0.0017  |          |        |        |        |        |        |        |        |  |  |  |  |  |  |  |  |  |  |
| CRAIG             | 0.0003 | 0.048   | 0.00866  |        |        |        |        |        |        |        |  |  |  |  |  |  |  |  |  |  |
| CRAIG-WARM        | 0.0002 | 0.0375  | 0.0492   | 0.0004 |        |        |        |        |        |        |  |  |  |  |  |  |  |  |  |  |
| CRAIGPB           | 0.0002 | 0.0334  | 0.0403   | 0.0010 | 0.0139 |        |        |        |        |        |  |  |  |  |  |  |  |  |  |  |
| CRAIGPB-WARM      | 0.0002 | 0.003   | 0.017    | 0.0002 | 0.0005 | 0.0002 |        |        |        |        |  |  |  |  |  |  |  |  |  |  |
| GRAD-MATCH        | 0.0002 | 0.028   | 0.031918 | 0.0030 | 0.0107 | 0.0254 | 0.015  |        |        |        |  |  |  |  |  |  |  |  |  |  |
| GRAD-MATCH-WARM   | 0.0002 | 0.0008  | 0.0018   | 0.0008 | 0.0057 | 0.0065 | 0.0117 | 0.0005 |        |        |  |  |  |  |  |  |  |  |  |  |
| GRAD-MATCHPB      | 0.0002 | 0.0048  | 0.0067   | 0.0002 | 0.0305 | 0.0002 | 0.0075 | 0.0248 | 0.0305 |        |  |  |  |  |  |  |  |  |  |  |
| GRAD-MATCHPB-WARM | 0.0002 | 0.00007 | 0.0028   | 0.0002 | 0.0002 | 0.0002 | 0.0011 | 0.0005 | 0.0091 | 0.0002 |  |  |  |  |  |  |  |  |  |  |

Table 8. Pairwise significance p-values using Wilcoxon signed rank test

optimizes the gradient error while CRAIG minimizes an upper bound. Also note that GLISTER has a significantly larger gradient error at 1% subset which partially explains the reason for bad performance of GLISTER for very small percentages.

**Redundant Points:** Table 10 shows the redundant points, i.e., data points that were never used for training for various subset selection algorithms on the MNIST dataset. The results give us an idea of information redundancy in the MNIST dataset while simultaneously showing that we can achieve similar performances to full training using a much smaller informative subset of the MNIST dataset.

| MNIST Gradient Error Results |       |                    |                          |         |         |        |        |
|------------------------------|-------|--------------------|--------------------------|---------|---------|--------|--------|
| Budget(%)                    |       |                    | Avg. Gradient error norm |         |         |        |        |
| Dataset                      | Model | Selection Strategy | 1%                       | 3%      | 5%      | 10%    | 30%    |
| MNIST                        | LeNet | RANDOM             | 410.1258                 | 18.135  | 10.515  | 9.5214 | 6.415  |
|                              |       | CRAIG              | 68.3288                  | 19.2665 | 10.9991 | 6.5159 | 0.3793 |
|                              |       | CRAIGPB            | 17.6352                  | 2.9641  | 1.3916  | 0.4417 | 0.0825 |
|                              |       | GLISTER            | 545.2769                 | 7.9193  | 1.8786  | 2.8121 | 0.3249 |
|                              |       | GRAD-MATCH         | 66.2003                  | 17.6965 | 9.8202  | 2.1122 | 0.3797 |
|                              |       | GRAD-MATCHPB       | 15.5273                  | 2.202   | 1.1684  | 0.3793 | 0.0587 |

Table 9. Gradient approximation relative to full training gradient for various data selection strategies for different subset sizes of MNIST dataset

| MNIST Redundant Points Results |       |                    |                                                       |           |           |           |           |
|--------------------------------|-------|--------------------|-------------------------------------------------------|-----------|-----------|-----------|-----------|
| Budget(%)                      |       |                    | Percentage of Redundant Points in MNIST training data |           |           |           |           |
| Dataset                        | Model | Selection Strategy | 1%                                                    | 3%        | 5%        | 10%       | 30%       |
| MNIST                          | LeNet | CRAIG              | 90.381481                                             | 74.057407 | 60.492593 | 36.788889 | 14.425926 |
|                                |       | CRAIGPB            | 90.405556                                             | 73.653704 | 60.327778 | 35.301852 | 2.875926  |
|                                |       | GLISTER            | 90.712963                                             | 77.540741 | 67.544444 | 45.940741 | 7.774074  |
|                                |       | GRAD-MATCH         | 91.124074                                             | 76.4      | 62.109259 | 36.114815 | 2.942593  |
|                                |       | GRAD-MATCHPB       | 90.187037                                             | 73.468519 | 59.757407 | 36.164815 | 6.751852  |

Table 10. Redunant points(i.e., points never used for training) for various data selection strategies for different subset sizes of MNIST dataset

**Comparison between variants of GRAD-MATCH:** Table 11 shows the test accuracy and the training time for PerClass, PerClassPerGradient and PerBatch variants of GRAD-MATCH using ResNet18 model on different subsets of CIFAR10 and CIFAR100 datasets. First, note that even though the PerClass variant achieves higher accuracy than the PerClassPerGradient variant, it is significantly slower, having a larger training time than full data training for the 30% subset of CIFAR10 and CIFAR100. Since the PerClass variant of GRAD-MATCH is not scalable, we use the PerClassPerGradient variant, which achieves comparable accuracies while being much faster. Finally, note that the PerBatch variants performed better than the other variants in test accuracy and training efficiency.

## GRAD-MATCH: Gradient Matching based Data Subset Selection for Efficient Training

| Comparison between variants of GRAD-MATCH |          |                     |                        |              |              |              |                             |               |             |             |
|-------------------------------------------|----------|---------------------|------------------------|--------------|--------------|--------------|-----------------------------|---------------|-------------|-------------|
| Budget(%)                                 |          |                     | Top-1 Test accuracy(%) |              |              |              | Model Training time(in hrs) |               |             |             |
|                                           |          |                     | 5%                     | 10%          | 20%          | 30%          | 5%                          | 10%           | 20%         | 30%         |
| Dataset                                   | Model    | GRAD-MATCH Variant  |                        |              |              |              |                             |               |             |             |
| CIFAR100                                  | ResNet18 | PerClassPerGradient | 41.01                  | 59.88        | 68.25        | 71.5         | 0.5143                      | 0.8114        | 1.40        | 2.002       |
|                                           |          | PerClass            | <b>41.57</b>           | 59.95        | 70.87        | 72.45        | 0.5357                      | 1.225         | 1.907       | 3.796       |
|                                           |          | PerBatch            | 40.53                  | <b>60.39</b> | <b>70.88</b> | <b>72.57</b> | <b>0.3797</b>               | <b>0.6115</b> | <b>1.09</b> | <b>1.56</b> |
| CIFAR10                                   | ResNet18 | PerClassPerGradient | <b>86.7</b>            | 90.9         | 91.67        | 91.89        | 0.40                        | 0.84          | 1.42        | 1.52        |
|                                           |          | PerClass            | 85.12                  | <b>91.04</b> | 92.12        | 93.69        | 0.4225                      | 1.042         | 1.92        | 3.48        |
|                                           |          | PerBatch            | 85.4                   | 90.01        | <b>93.34</b> | <b>93.75</b> | <b>0.36</b>                 | <b>0.69</b>   | <b>1.09</b> | <b>1.38</b> |

Table 11. Top-1 test accuracy(%) and training times for variants of GRAD-MATCH for different subset sizes of CIFAR10, CIFAR100 datasets

| Additional Data Selection Results |           |                    |                        |
|-----------------------------------|-----------|--------------------|------------------------|
| Budget(%)                         |           |                    | Top-1 Test accuracy(%) |
| Dataset                           | Model     | Selection strategy | 30%                    |
| CIFAR100                          | ResNet164 | Facility Location  | 91.1                   |
|                                   |           | Forgetting Events  | 92.3                   |
|                                   |           | Entropy            | 90.4                   |
|                                   |           | GRAD-MATCHPB-WARM  | <b>94.17</b>           |
| CIFAR10                           | ResNet164 | Facility Location  | 64.8                   |
|                                   |           | Forgetting Events  | 63.4                   |
|                                   |           | Entropy            | 60.4                   |
|                                   |           | GRAD-MATCHPB-WARM  | <b>74.62</b>           |

Table 12. Top-1 test accuracy(%) and training times for additional data selection strategies on 30% CIFAR10 and CIFAR100 subset

**Comparison with additional subset selection methods:** In addition to the baselines we considered so far, we compare GRAD-MATCH with additional existing subset selection strategies like Facility Location (Wolf, 2011), Entropy (Settles, 2012) and Forgetting Events (Toneva et al., 2019) on CIFAR10 and CIFAR100 datasets. The results are in Table 12. Note that we used the numbers reported in paper (Coleman et al., 2020) for comparison. The authors in (Coleman et al., 2020) used a ResNet-164 Model which is a higher complexity model compared to ResNet-18 which we use in our experiments. Even after using a lower complexity model (ResNet-18), we outperform these other baselines on both CIFAR-10 and CIFAR-100. Furthermore, we achieve this while being much faster (since we observed that the ResNet-164 model is roughly 4x slower compared to ResNet-18). Even though a much smaller model (ResNet-20) is used for data selection, the training is still done with the ResNet-164 model. Finally, note that the selection via proxy method is orthogonal to GRAD-MATCH and can also be applied to GRAD-MATCH to achieve further speedups. We expect that the accuracy of these baselines (Forgetting Events, Facility Location, and Entropy) to be even lower if they are used with a ResNet-18 model. The accuracy reported for these baselines (Table 12) are the best among the different proxy models used in (Coleman et al., 2020).
